# Supplementary material
Source: MDPI journal article supplement (https://www.mdpi.com/2075-163X/10/10/931)
Supplement: s1 [file s1]

## Sheet: Tabelle1
ID	Read.No	Time	Type	Duration	Units	Sequence	SAMPLE	Ce	Ce Error	Ba	Ba Error	Sb	Sb Error	Sn	Sn Error	Cd	Cd Error	Ag	Ag Error	Bal	Bal Error	U	U Error	Nb	Nb Error	Zr	Zr Error	Y	Y Error	Sr	Sr Error	Rb	Rb Error	Bi	Bi Error	As	As Error	Se	Se Error	Au	Au Error	Pb	Pb Error	Hg	Hg Error	Zn	Zn Error	Cu	Cu Error
1	62	2019-03-08 12:20:00	Mining	300	ppm	Final	Standard_GBW_07411	96.7	13	796.33	43.66	< LOD	16.06	69.67	9.21	39.51	5.26	< LOD	4.63	578351	1660.86	< LOD	3.11	14.75	2.36	193.7	3.51	24.5	2.91	130	2.87	116.3	3.95	< LOD	14.51	150.53	21.54	< LOD	2.16	< LOD	8.74	2708.82	28.32	< LOD	3.34	3836.95	40.67	67.31	10.26
2	61	2019-03-08 12:15:00	Mining	300	ppm	Final	Standard_GBW_07411	92.18	13	782.04	43.82	< LOD	22.2	68.53	9.22	35.67	5.22	< LOD	4.61	559918	1769.74	< LOD	3.17	14.2	2.39	189.04	3.53	23.23	2.95	126.89	2.89	121.51	4.06	< LOD	11.42	152.26	21.8	< LOD	2.43	< LOD	8.75	2699.21	28.75	3.51	2.27	3818.63	41.22	61.39	10.27
3	60	2019-03-08 12:09:00	Mining	300	ppm	Final	Standard_GBW_07411	94.73	12.93	786.96	43.43	< LOD	22.58	70.78	9.18	33.49	5.15	4.87	3.08	566102	1723.37	< LOD	3.9	11.69	2.38	191.47	3.52	23.13	2.93	127.62	2.87	119.22	4.04	< LOD	10.63	145.83	21.7	< LOD	2.36	< LOD	9.07	2708.81	28.58	< LOD	3.88	3818.83	40.92	61.43	10.24
4	59	2019-03-08 12:03:00	Mining	300	ppm	Final	Standard_GBW_07411	88.96	12.94	743.79	43.44	< LOD	17.2	63.99	9.15	31.54	5.16	< LOD	5.01	574914	1684.11	< LOD	3.16	13.63	2.37	191.75	3.5	23.53	2.92	128.46	2.86	118.58	4	< LOD	8.84	130.67	21.58	< LOD	2.36	< LOD	8.94	2721.87	28.5	< LOD	3.36	3821.11	40.71	58.92	10.11
5	58	2019-03-08 11:58:00	Mining	300	ppm	Final	Standard_GBW_07411	84.44	12.9	752.14	43.56	< LOD	19.43	66.61	9.2	29.5	5.13	5.96	3.12	559041	1777.45	< LOD	3.2	13.91	2.41	190.48	3.55	26.61	2.97	126.08	2.88	115.92	4.03	< LOD	8.94	143.58	21.81	< LOD	2.42	< LOD	9.03	2705.2	28.82	< LOD	3.4	3781.7	41.02	58.96	10.22
6	57	2019-03-08 11:52:00	Mining	300	ppm	Final	Standard_GBW_07411	88.84	12.91	753.43	43.4	< LOD	16.02	69.98	9.2	31.72	5.15	< LOD	4.6	556849	1767.83	< LOD	3.45	12.25	2.39	194.8	3.57	24.02	2.95	128.98	2.9	119.08	4.05	< LOD	13.56	166.87	21.86	< LOD	2.42	< LOD	8.67	2697.62	28.65	< LOD	3.36	3820.12	41.14	70.41	10.48
7	56	2019-03-08 11:39:00	Mining	300	ppm	Final	Standard_GBW_07411	81.73	12.91	768.76	43.71	< LOD	17.16	72.52	9.27	35.58	5.23	< LOD	4.63	559649	1754.36	< LOD	3.71	12.36	2.39	191.31	3.53	22.73	2.93	128.2	2.89	116.87	4.03	< LOD	10.47	152.05	21.75	< LOD	2.37	< LOD	8.77	2698.24	28.58	< LOD	3.37	3802.5	40.93	57.3	10.19
8	55	2019-03-08 11:34:00	Mining	300	ppm	Final	Standard_GBW_07411	88.64	12.92	756.76	43.46	< LOD	22.1	68.2	9.2	29.7	5.13	< LOD	4.62	558295	1736.28	< LOD	5.21	12.46	2.37	188.97	3.46	23.75	2.89	128.53	2.84	115.75	3.98	< LOD	15.17	144.27	21.39	< LOD	2.41	< LOD	8.9	2699.5	28.17	< LOD	3.85	3800.24	40.3	65.29	10.18
9	54	2019-03-08 11:28:00	Mining	300	ppm	Final	Standard_GBW_07411	90.76	13.04	723.89	43.64	< LOD	15.07	71.24	9.3	36.21	5.26	< LOD	6.18	562798	1722.06	< LOD	3.13	14.55	2.36	190.56	3.48	23.28	2.91	128.05	2.85	118.28	3.98	< LOD	12.37	151.7	21.54	< LOD	2.34	< LOD	8.87	2702.47	28.3	4.07	2.28	3779.07	40.34	64.69	10.19
10	53	2019-03-08 11:23:00	Mining	300	ppm	Final	Standard_GBW_07411	92.86	13.13	768.21	44.08	< LOD	22.44	71.04	9.35	30.91	5.21	6.76	3.17	560260	1769.07	4.47	2.85	11.07	2.44	195.45	3.59	24.62	2.98	129.66	2.92	117.67	4.12	< LOD	11.92	159.58	22.02	< LOD	2.47	< LOD	8.9	2729.58	29.02	< LOD	4.45	3838.27	41.47	57.53	10.27
11	52	2019-03-08 11:16:00	Mining	300	ppm	Final	Standard_GBW_07411	85.64	12.95	790.35	43.81	< LOD	16.86	71.79	9.27	34.72	5.22	< LOD	4.62	562385	1725.2	< LOD	4.06	14.34	2.38	185.93	3.44	24.22	2.91	129.8	2.87	117.38	3.99	< LOD	10.6	158.1	21.51	< LOD	2.36	< LOD	8.85	2702.39	28.26	3.86	2.27	3809.99	40.47	56.89	10.04
12	51	2019-03-08 11:09:00	Mining	300	ppm	Final	Standard_GBW_07411	87.94	12.82	761.96	43.19	< LOD	22.98	71.56	9.17	30.88	5.11	4.69	3.07	575171	1677.24	< LOD	3.33	12.04	2.36	186.39	3.46	25.31	2.92	129.34	2.87	118.7	4	< LOD	10.58	166.35	21.58	< LOD	2.32	< LOD	8.73	2690.63	28.28	5.5	2.31	3803.1	40.56	63.22	10.2
13	50	2019-03-08 11:03:00	Mining	300	ppm	Final	Standard_GBW_07411	79.99	12.98	723.15	43.75	< LOD	21.75	76.31	9.38	29.66	5.19	< LOD	5.97	590886	1605.11	< LOD	3.49	13.02	2.34	187.8	3.43	23.16	2.87	128.03	2.82	117.23	3.95	< LOD	12.57	156.42	21.33	< LOD	2.3	< LOD	8.7	2705.15	28.03	3.55	2.23	3808.31	40.1	53.58	9.89
14	49	2019-03-08 10:55:00	Mining	300	ppm	Final	Standard_GBW_07411	82.01	12.99	722.26	43.73	< LOD	23.96	70.95	9.32	31.17	5.2	< LOD	4.66	588851	1642.58	< LOD	3.31	12.75	2.39	186.36	3.48	22.8	2.94	124.8	2.85	117.43	4.03	< LOD	8.91	117.43	21.71	< LOD	2.44	< LOD	8.92	2719.39	28.73	< LOD	3.41	3814.54	41.02	51.18	10.04
15	48	2019-03-08 10:49:00	Mining	300	ppm	Final	Standard_GBW_07411	87.45	13.09	704.69	43.82	< LOD	15.13	64.56	9.3	33.77	5.26	6.34	3.17	591535	1634.8	< LOD	3.19	14.99	2.4	186.45	3.49	22.13	2.93	126.18	2.87	116.65	4.01	< LOD	8.86	148.41	21.83	< LOD	2.38	< LOD	8.93	2715.8	28.73	4.28	2.3	3816.89	41.06	49.65	10.02
16	47	2019-03-08 10:37:00	Mining	300	ppm	Final	Standard_GBW_07411	90.24	13.01	777.66	43.8	< LOD	15.01	74.93	9.32	31.06	5.17	8.77	3.19	610980	1580.28	< LOD	4.15	13.27	2.4	185.73	3.48	21.58	2.93	126.7	2.87	116.7	4.03	< LOD	8.9	150.53	21.82	< LOD	2.43	< LOD	9.08	2718.3	28.73	3.86	2.3	3788.03	40.85	58.37	10.18
17	2993	2019-01-10 18:40:00	Mining	300	ppm	Final	Standard_GBW_07411	87.88	12.98	703.61	39.78	< LOD	8.35	33.05	4.48	29.33	3.86	< LOD	3.49	580030	1708.31	< LOD	3.16	20.38	3.4	177.66	3.33	26.53	2.95	84.95	1.91	115.27	3.96	22.68	5.27	162.2	22.39	< LOD	2.36	< LOD	9.04	2651.33	27.93	7.36	2.37	3839.7	40.96	37.34	7.42
18	2992	2019-01-10 18:34:00	Mining	300	ppm	Final	Standard_GBW_07411	107.95	13.13	713.96	39.7	< LOD	9.9	35.73	4.49	28.36	3.83	5.28	2.44	610552	1619.74	< LOD	4.26	15.4	3.47	180.86	3.4	27.13	2.99	85.97	1.94	113.42	4.05	18.15	5.29	169.72	22.7	< LOD	2.31	< LOD	9.38	2663.66	28.37	< LOD	3.46	3865.32	41.64	43.93	7.66
19	2991	2019-01-10 18:24:00	Mining	300	ppm	Final	20080027800005_0_ht	< LOD	14.76	196.73	34.48	< LOD	8.72	10.35	3.96	20.79	3.56	7.62	2.42	642569	1409.17	15.78	2.69	24.1	3.35	186.61	3.07	28.7	1.65	95.59	1.82	112.14	3.75	9.43	2.07	847.38	12.01	< LOD	1.53	< LOD	5.66	28.69	3.32	4.43	1.92	76.03	6.22	10.86	6.41
20	2990	2019-01-10 18:16:00	Mining	300	ppm	Final	20080027800005_0_ht	< LOD	14.69	178.69	34.45	< LOD	11.01	12.72	4	23.17	3.61	7.98	2.45	633824	1457.02	16.99	2.72	25.06	3.4	184.33	3.08	28.93	1.68	99.56	1.87	117.2	3.83	9.64	2.1	931.93	12.72	< LOD	1.6	< LOD	5.87	25.76	3.27	3.47	1.92	75.84	6.25	13.76	6.53
21	2989	2019-01-10 18:08:00	Mining	300	ppm	Final	20080027800005_0_ht	< LOD	15.39	241.41	35.17	< LOD	13.69	13.11	4.04	19.9	3.58	5.01	2.38	651918	1383.58	14.47	2.67	27.75	3.35	178.26	3	29.33	1.65	93.6	1.79	111.2	3.72	8.97	2.04	827.2	11.81	< LOD	1.6	< LOD	5.77	25.87	3.24	3.4	1.89	83.62	6.37	12.22	6.4
22	2988	2019-01-10 18:01:00	Mining	300	ppm	Final	20080027800005_0_ht	< LOD	15.29	219.1	35.55	< LOD	8.99	6.35	4.01	19.81	3.63	7.5	2.47	664909	1356.12	14.51	2.71	26.11	3.39	182.34	3.08	29.38	1.68	96.72	1.85	114.21	3.79	6.59	2.02	853.83	12.18	< LOD	1.6	< LOD	5.9	26.38	3.29	< LOD	3.09	82.33	6.44	12.38	6.53
23	2987	2019-01-10 17:49:00	Mining	300	ppm	Final	20080020100013_769_ht	< LOD	14.78	228.84	34.21	< LOD	8.91	11.61	3.93	24.36	3.56	7.53	2.38	667189	1278.24	12.43	2.6	22.75	3.24	233.41	3.4	29.71	1.68	135.22	2.13	136.89	3.83	8.76	2.05	857.44	11.87	< LOD	1.9	< LOD	5.48	28.48	3.26	< LOD	3.4	171.59	7.99	94.46	7.85
24	2986	2019-01-10 17:40:00	Mining	300	ppm	Final	20080020100013_769_ht	< LOD	14.9	234.96	34.42	< LOD	8.68	9.96	3.93	17.23	3.46	5.29	2.33	661533	1308.52	11.43	2.58	25.89	3.23	234.12	3.39	28.53	1.66	134.29	2.11	136.31	3.79	7.25	2	831.43	11.62	< LOD	1.5	< LOD	5.61	30.41	3.26	< LOD	3.16	167.86	7.89	95.7	7.8
25	2985	2019-01-10 17:32:00	Mining	300	ppm	Final	20080020100013_769_ht	< LOD	14.62	214.95	33.96	< LOD	7.52	< LOD	5.75	19.87	3.47	5.69	2.32	671782	1260.76	9.59	2.54	27.33	3.2	236.38	3.38	28.93	1.66	137.26	2.12	138.68	3.76	7.54	2	834.54	11.55	< LOD	1.5	< LOD	5.4	29.12	3.22	< LOD	3.39	181	8.05	94.52	7.73
26	2984	2019-01-10 17:24:00	Mining	300	ppm	Final	20080020100013_769_ht	< LOD	14.61	308.86	33.96	< LOD	8.45	10.65	3.84	25.41	3.5	9.35	2.36	672702	1261.12	10.97	2.55	25.33	3.19	230.53	3.33	29.53	1.66	136.61	2.11	137.18	3.76	8.39	2	840.21	11.56	< LOD	1.5	< LOD	5.34	28.39	3.2	< LOD	2.97	167.39	7.8	93.56	7.68
27	2983	2019-01-10 17:13:00	Mining	300	ppm	Final	20080015500007_2281_ht	< LOD	14.58	248.99	34.45	< LOD	10.79	8.46	3.9	20.14	3.51	6.18	2.35	660831	1301.69	10.96	2.57	21.13	3.19	259.79	3.52	27.12	1.61	93.76	1.76	115.1	3.62	6.65	1.96	822.96	11.6	< LOD	1.5	< LOD	5.38	37.38	3.43	< LOD	3.28	85.59	6.28	< LOD	13.17
28	2982	2019-01-10 17:05:00	Mining	300	ppm	Final	20080015500007_2281_ht	< LOD	15.04	355.19	34.8	9.79	5.76	8.49	3.88	17.95	3.44	6.48	2.33	679046	1237.91	9.38	2.54	21.22	3.15	258.32	3.48	26.28	1.57	90.03	1.71	108.87	3.54	5.02	1.88	789.87	11.27	< LOD	1.5	< LOD	5.38	33.03	3.3	< LOD	2.68	78.79	6.11	< LOD	11.79
29	2981	2019-01-10 16:55:00	Mining	300	ppm	Final	20080015500007_2281_ht	< LOD	14.46	253.4	34.21	< LOD	7.54	7.62	3.85	20.67	3.49	6.9	2.36	659648	1315.16	12.44	2.61	24.83	3.26	268.51	3.6	25.53	1.6	94.93	1.78	115.02	3.67	8.04	2	824.15	11.66	< LOD	1.53	< LOD	5.33	33.61	3.38	3.11	1.83	85.24	6.3	< LOD	8.69
30	2980	2019-01-10 16:45:00	Mining	300	ppm	Final	20080015500007_2281_ht	< LOD	14.92	329.93	34.98	< LOD	9.88	8.23	3.91	18.88	3.49	5.95	2.34	683242	1238.15	9.12	2.57	23.77	3.2	255.35	3.5	25.96	1.59	91.94	1.75	112.36	3.6	5.61	1.93	799.6	11.48	< LOD	1.5	< LOD	5.5	34.89	3.4	3.11	1.84	81.15	6.23	9.76	6.18
31	2979	2019-01-10 16:37:00	Mining	300	ppm	Final	20080015500007_2281_ht	< LOD	14.78	292.27	34.65	< LOD	8.63	< LOD	5.79	15.66	3.43	4.63	2.3	672106	1267.04	10.53	2.56	22.91	3.19	263.19	3.53	26.32	1.58	92.36	1.74	110.87	3.58	7.82	1.96	795.29	11.34	< LOD	1.5	< LOD	5.23	33.04	3.32	< LOD	2.69	80.72	6.16	< LOD	10.86
32	2978	2019-01-10 16:29:00	Mining	300	ppm	Final	20080015500007_2281_ht	< LOD	14.48	314.82	34.18	< LOD	9.82	10.02	3.85	18.42	3.41	5.97	2.3	694971	1187.21	8.48	2.54	23.43	3.16	259.33	3.5	25.7	1.58	90.94	1.72	111.53	3.55	6.41	1.92	817.24	11.49	< LOD	1.51	< LOD	5.6	31.71	3.29	< LOD	2.72	79.6	6.14	9.26	6.13
33	2977	2019-01-10 16:21:00	Mining	300	ppm	Final	20080015500007_2281_ht	< LOD	14.82	309.96	34.65	< LOD	9.76	< LOD	5.79	19.76	3.48	6.8	2.34	674316	1266.64	11.56	2.58	19.23	3.19	259.91	3.52	26.75	1.59	92.85	1.75	108.61	3.58	6.16	1.93	806.76	11.49	< LOD	1.5	< LOD	5.34	37.56	3.44	< LOD	2.68	85.87	6.29	< LOD	13.17
34	2976	2019-01-10 16:13:00	Mining	300	ppm	Final	20080015500007_2281_ht	< LOD	15.09	328.88	35.14	< LOD	8.73	< LOD	6.36	17.41	3.48	6.73	2.36	677048	1248.96	9.52	2.54	22.06	3.16	255.44	3.47	25.75	1.57	90.62	1.72	110.7	3.55	7.33	1.94	794.23	11.3	< LOD	1.5	< LOD	5.48	32.11	3.29	< LOD	3.27	77.89	6.08	< LOD	9.06
35	2975	2019-01-10 16:02:00	Mining	300	ppm	Final	20080031400002_2325	< LOD	14.22	122.99	32.79	11.57	5.66	9.23	3.8	25.42	3.52	8.44	2.38	657022	1363.36	20.68	2.75	24.25	3.44	362.54	4.29	35.54	1.76	86.98	1.73	124.85	3.91	8.52	2.07	26.16	3.5	< LOD	2.31	< LOD	4.42	28.61	3.32	4.43	1.82	82.25	6.35	18.86	6.64
36	2974	2019-01-10 15:52:00	Mining	300	ppm	Final	20080031400002_2325	< LOD	14.1	218.94	32.2	< LOD	10.14	7.16	3.66	19.28	3.28	7.62	2.23	707365	1133.2	8.63	2.47	24.88	3.09	251.8	3.34	29.61	1.58	76.7	1.54	117.27	3.5	5.73	1.84	19.66	3.03	< LOD	1.5	< LOD	4.01	21.96	2.92	< LOD	1.5	62.64	5.59	11.96	5.93
37	2973	2019-01-10 15:45:00	Mining	300	ppm	Final	20080031400002_2325	< LOD	14.14	219.91	32.3	< LOD	12.48	7.21	3.67	22.08	3.34	4.94	2.19	688846	1177.11	8.76	2.44	27.36	3.07	249.79	3.29	28.29	1.54	79.62	1.55	113.98	3.44	8.91	1.89	19.84	3.01	< LOD	1.5	< LOD	3.89	22.35	2.9	< LOD	2.88	63.27	5.55	< LOD	8.69
38	2972	2019-01-10 15:39:00	Mining	300	ppm	Final	20080031400002_2325	< LOD	13.71	148.15	31.75	< LOD	9.09	10.6	3.69	22.05	3.33	7.82	2.26	697835	1174.21	13.26	2.55	23.69	3.19	278.88	3.57	31.18	1.64	85.49	1.64	124.84	3.66	6.73	1.92	21.89	3.15	< LOD	1.71	< LOD	4.13	23.44	3.02	< LOD	2.36	66.9	5.75	< LOD	13.01
39	2971	2019-01-10 15:31:00	Mining	300	ppm	Final	20080031400002_2325	< LOD	14.09	207.5	32.35	< LOD	12.01	7.61	3.69	19.35	3.31	7.33	2.25	715525	1114.41	12.47	2.52	25.42	3.16	269.82	3.47	31.59	1.61	77.78	1.56	116.94	3.56	10.46	1.96	22.4	3.12	< LOD	1.5	< LOD	4.17	22.63	2.98	< LOD	2.48	66.62	5.7	< LOD	8.82
40	2970	2019-01-10 15:23:00	Mining	300	ppm	Final	20080031400002_2325	< LOD	14.86	262.14	33.64	< LOD	7.39	< LOD	5.67	17.32	3.37	< LOD	3.31	730103	1054.64	6.61	2.45	29.85	3.1	250.23	3.33	27.33	1.56	75.89	1.54	120.93	3.51	6.35	1.87	19.69	3.03	< LOD	1.5	< LOD	4.07	21.18	2.92	< LOD	2.5	64.94	5.68	< LOD	12.62
41	2969	2019-01-10 15:15:00	Mining	300	ppm	Final	20080031400002_2325	< LOD	13.88	208	32	< LOD	8.09	< LOD	5.42	19.85	3.28	5.73	2.19	706947	1127.16	8.69	2.45	25.56	3.08	266.75	3.42	29.71	1.6	78.47	1.55	131.36	3.58	6.14	1.87	19.52	3.05	< LOD	1.5	< LOD	3.97	23.6	2.96	< LOD	1.88	61.55	5.53	< LOD	8.66
42	2968	2019-01-10 15:08:00	Mining	300	ppm	Final	Standard_GBW_07411	93.04	12.98	715.38	39.7	< LOD	8.42	35.14	4.49	27.16	3.82	6.33	2.46	623489	1557.87	< LOD	3.15	19.5	3.38	180.71	3.34	25.35	2.94	86.19	1.92	115.11	3.94	19.33	5.23	158.5	22.38	< LOD	2.35	< LOD	8.88	2667.48	27.97	6.51	2.33	3848.11	40.91	38.61	7.43
43	2967	2019-01-10 15:00:00	Mining	300	ppm	Final	Standard_GBW_07411	103.7	13.12	730.21	39.89	< LOD	13.34	32.87	4.47	30.42	3.87	< LOD	3.62	614263	1595.1	< LOD	3.6	19.23	3.44	179.82	3.37	26.01	2.98	86.72	1.95	116.07	4.01	22.92	5.33	163.48	22.62	< LOD	2.31	< LOD	8.85	2665.92	28.26	5.77	2.32	3858.96	41.42	39.85	7.54
44	2966	2019-01-10 14:49:00	Mining	300	ppm	Final	20080029600009_2008	< LOD	15.71	355.94	36.35	< LOD	8.99	8.84	4.05	22.21	3.66	7.99	2.47	725331	1133.28	14.22	2.68	21.52	3.32	184.57	3.09	27.75	1.71	107.93	1.94	145.77	4.01	10.6	2.15	12.05	2.87	< LOD	1.5	< LOD	4.62	14.34	2.95	< LOD	3.12	68.15	6.08	< LOD	14.16
45	2965	2019-01-10 14:39:00	Mining	300	ppm	Final	20080029600009_2008	< LOD	15.43	376.68	35.72	< LOD	8.78	< LOD	5.87	17.32	3.5	5.58	2.36	699361	1206.32	8.86	2.57	24.02	3.21	172.26	2.95	25.61	1.66	106.85	1.9	149.15	3.91	9.36	2.09	7.58	2.83	< LOD	1.5	< LOD	4.46	18.51	3	< LOD	3.28	69.27	6.02	9.92	6.26
46	2964	2019-01-10 14:29:00	Mining	300	ppm	Final	20080029600009_2008	< LOD	15.31	346.7	35.37	< LOD	8.73	12.19	3.98	24.04	3.6	6.7	2.39	704826	1188.28	12.96	2.64	22.19	3.28	176	2.99	27.72	1.7	111.79	1.95	151.64	3.99	12.23	2.18	9.17	2.92	< LOD	1.5	< LOD	4.39	19.42	3.08	< LOD	2.66	66.99	5.99	16.54	6.44
47	2963	2019-01-10 14:20:00	Mining	300	ppm	Final	20080029600009_2008	< LOD	15.36	384.61	35.55	12.31	5.87	9.28	3.95	16.34	3.47	5.84	2.35	700340	1191.22	10.09	2.58	23.58	3.21	178.49	2.97	27.53	1.67	106.63	1.88	148.05	3.89	11.7	2.13	8.5	2.81	< LOD	1.5	< LOD	4.37	17.36	2.96	< LOD	2.61	68.83	5.97	10.71	6.24
48	2962	2019-01-10 14:08:00	Mining	300	ppm	Final	20080029600009_2008	< LOD	15.88	426.09	36.25	< LOD	11.05	< LOD	5.93	14.57	3.49	7.07	2.4	699857	1195.67	7.77	2.55	23.95	3.19	175.37	2.95	25.5	1.66	106.78	1.89	148.84	3.87	10.23	2.11	5.78	2.86	< LOD	1.5	< LOD	4.5	21.37	3.08	< LOD	2.82	64.16	5.89	11.47	6.28
49	2961	2019-01-10 13:56:00	Mining	300	ppm	Final	20080029600009_2008	< LOD	15.55	412.63	36.02	9.51	5.89	< LOD	5.88	15.91	3.49	3.52	2.31	703544	1184.42	10.04	2.56	22.89	3.19	179.54	2.97	24.64	1.63	108.16	1.89	147.15	3.87	9.77	2.08	8.57	2.84	< LOD	1.5	< LOD	4.56	19.04	2.99	< LOD	2.62	61.97	5.79	< LOD	9.16
50	2960	2019-01-10 13:48:00	Mining	300	ppm	Final	20080029600009_2008	< LOD	15.22	379.59	35.68	< LOD	8.79	< LOD	5.85	17.58	3.5	5.19	2.34	722268	1128.04	10.21	2.59	23.97	3.23	174.52	2.97	25.43	1.66	108.21	1.92	145.97	3.91	10.72	2.12	7.76	2.85	< LOD	1.5	< LOD	4.54	18.68	3.03	< LOD	2.63	64.97	5.93	14.93	6.36
51	2959	2019-01-10 13:41:00	Mining	300	ppm	Final	20080029600009_2008	< LOD	14.91	248.54	35.06	< LOD	8.8	7.56	3.95	20.72	3.58	7.71	2.43	710824	1173.02	13.17	2.64	24.61	3.3	184.29	3.07	27.64	1.7	113.02	1.97	151.14	4	13.73	2.22	9.34	2.9	< LOD	1.5	< LOD	4.32	18.64	3.06	< LOD	2.47	70.07	6.06	12.9	6.38
52	2958	2019-01-10 13:34:00	Mining	300	ppm	Final	20080029600055_2221	< LOD	15.05	352.41	34.08	< LOD	11.48	7.83	3.81	11	3.61	< LOD	4.41	725313	1069.9	7.84	2.45	19.34	3.02	280.71	3.48	27.37	1.53	57.05	1.33	111.91	3.43	5.99	1.78	4	2.46	< LOD	1.5	< LOD	3.96	13.94	2.65	< LOD	2.5	63.45	5.62	< LOD	8.76
53	2957	2019-01-10 13:27:00	Mining	300	ppm	Final	20080029600055_2221	< LOD	14.47	339.09	33.01	< LOD	10.58	< LOD	5.49	16.91	3.27	6.02	2.21	715230	1084.73	6.71	2.39	21.95	2.97	254.73	3.25	27.04	1.51	56.49	1.3	118.82	3.41	5.15	1.74	6.08	2.46	< LOD	1.5	< LOD	3.85	13.58	2.6	< LOD	1.51	61.48	5.47	< LOD	8.57
54	2956	2019-01-10 13:18:00	Mining	300	ppm	Final	20080029600055_2221	< LOD	14.88	363.79	33.96	< LOD	12.14	< LOD	5.63	11	2.63	< LOD	4.06	693124	1163.6	7.03	2.41	17.92	2.97	256.61	3.29	27.14	1.51	57.81	1.32	113.51	3.4	5.63	1.75	5.71	2.46	< LOD	1.5	< LOD	4.01	13.44	2.6	< LOD	1.5	66.75	5.63	< LOD	12.51
55	2955	2019-01-10 13:11:00	Mining	300	ppm	Final	20080029600055_2221	< LOD	14.9	334.06	33.57	< LOD	11.06	< LOD	5.6	11	3.37	< LOD	3.25	697537	1143.65	7.67	2.42	21.97	3.01	280.21	3.44	26.51	1.51	56.47	1.31	113.5	3.4	6.65	1.78	4.11	2.47	< LOD	1.5	< LOD	3.98	14.88	2.66	< LOD	1.5	66.02	5.61	< LOD	11.4
56	2954	2019-01-10 13:05:00	Mining	300	ppm	Final	20080029600055_2221	< LOD	14.51	302.4	32.92	< LOD	8.22	< LOD	5.5	16.58	3.28	4.76	2.19	702070	1127.48	7.36	2.41	20.56	2.99	271.05	3.37	28.03	1.53	56.9	1.31	115.67	3.41	6.31	1.77	5.88	2.5	< LOD	1.81	< LOD	3.89	14.5	2.65	< LOD	1.5	65.76	5.59	11.12	5.83
57	2953	2019-01-10 12:58:00	Mining	300	ppm	Final	20080029600055_2221	< LOD	14.76	327.14	33.55	< LOD	7.39	< LOD	7.39	13.59	3.32	3.4	2.21	713090	1053.85	5.53	2.4	20.05	2.97	267.05	3.36	27.21	1.52	57.33	1.32	115.84	3.41	5.95	1.77	4.04	2.45	< LOD	1.5	< LOD	3.91	13.9	2.63	< LOD	1.62	69.9	5.74	< LOD	8.67
58	2952	2019-01-10 12:51:00	Mining	300	ppm	Final	20080029600055_2221	< LOD	14.39	287.41	33.06	< LOD	7.22	< LOD	6.4	11	4.24	4.68	2.2	701281	1131.61	7.7	2.42	21.51	3.01	273.28	3.39	29.32	1.54	57.26	1.32	114.19	3.41	6.47	1.77	4.74	2.45	< LOD	1.5	< LOD	4.03	13.71	2.63	< LOD	1.5	61.66	5.5	9.79	5.8
59	2951	2019-01-10 12:44:00	Mining	300	ppm	Final	20080029600055_2221	< LOD	14.59	294.5	33.07	< LOD	9.02	< LOD	6.39	13.38	3.25	4.86	2.2	711378	1120.57	7.29	2.44	20.47	3.03	294.75	3.57	28.59	1.54	56.84	1.33	110.54	3.41	6.02	1.77	6.51	2.49	< LOD	1.5	< LOD	4.1	12.73	2.62	< LOD	1.52	67.52	5.71	< LOD	10.85
60	2950	2019-01-10 12:35:00	Mining	300	ppm	Final	20080027800005_0	< LOD	14.15	126.84	32.73	< LOD	12.62	9.59	3.8	22.55	3.45	7.59	2.33	654356	1337.45	16.17	2.61	23.05	3.25	163.14	2.79	28.03	1.57	85.61	1.67	99.35	3.55	8.84	1.94	15.26	2.98	< LOD	1.5	< LOD	4.31	20.48	2.99	< LOD	2.56	71.09	5.93	14.6	6.23
61	2949	2019-01-10 12:29:00	Mining	300	ppm	Final	20080027800005_0	< LOD	14	107.85	32.48	< LOD	8.37	9.83	3.79	20.92	3.41	8.03	2.34	639305	1390.81	13.12	2.56	24.57	3.2	165.67	2.8	27.51	1.56	87.31	1.67	103.34	3.52	8.54	1.93	15.32	2.98	< LOD	1.5	< LOD	4.19	21.13	2.98	< LOD	2.19	70.79	5.89	13.68	6.17
62	2948	2019-01-10 12:22:00	Mining	300	ppm	Final	20080027800005_0	< LOD	14.1	132.47	32.53	< LOD	10.51	8.44	3.76	21.67	3.41	8.89	2.35	681533	1247.25	14.69	2.58	21.85	3.21	156.45	2.73	27.96	1.56	85.49	1.66	100.05	3.52	8.55	1.92	14.16	2.97	< LOD	1.5	< LOD	4.28	21.69	2.99	< LOD	3.21	64	5.74	13.81	6.17
63	2947	2019-01-10 12:13:00	Mining	300	ppm	Final	20080027800005_0	< LOD	14.26	145.68	33.09	< LOD	10.76	5.8	3.78	19.99	3.43	6.02	2.3	678548	1262.03	14.75	2.58	21.36	3.19	161.49	2.76	26.14	1.53	83.21	1.63	97.45	3.49	7.21	1.88	15.08	2.97	< LOD	1.5	< LOD	4.08	21.12	2.97	< LOD	2.35	66.35	5.78	10.73	6.07
64	2946	2019-01-10 12:06:00	Mining	300	ppm	Final	20080027800005_0	< LOD	13.85	69.1	32.26	< LOD	8.38	9.31	3.77	23.27	3.46	6.9	2.32	621257	1458.53	16.64	2.62	20.84	3.25	170.49	2.85	29.31	1.59	88.21	1.69	103.55	3.59	11.35	2.01	14.74	3.02	< LOD	1.5	< LOD	4.42	22.01	3.04	< LOD	3.08	73.62	5.99	< LOD	9.15
65	2945	2019-01-10 12:00:00	Mining	300	ppm	Final	20080027800005_0	< LOD	13.87	93.21	32.44	< LOD	7.33	10.27	3.79	21.74	3.44	7.02	2.33	678616	1276.97	17.38	2.64	21.98	3.27	167.83	2.84	28.93	1.59	86.49	1.68	101.42	3.6	10.23	1.99	16.99	3.07	< LOD	1.5	< LOD	4.21	21.87	3.04	2.85	1.73	74.3	6.03	21.45	6.42
66	2944	2019-01-10 11:52:00	Mining	300	ppm	Final	20080027800005_0	< LOD	13.79	129.36	31.85	< LOD	8.09	10.02	3.7	22.28	3.35	7.21	2.26	699070	1179.42	13.13	2.53	23.66	3.15	164.64	2.75	26.34	1.52	83.06	1.61	101.96	3.46	9.16	1.91	15.64	2.91	< LOD	1.5	< LOD	4.27	19.49	2.9	< LOD	2.49	68.7	5.76	13.37	6.01
67	2943	2019-01-10 11:45:00	Mining	300	ppm	Final	20080027800005_0	< LOD	13.83	113.25	32.04	< LOD	8.22	10.95	3.74	21.52	3.38	8.15	2.31	725426	1092.2	15.76	2.59	23	3.22	170.87	2.83	29.15	1.57	88.83	1.68	102.24	3.53	10.26	1.96	16.51	2.96	< LOD	1.85	< LOD	4.28	19.23	2.93	< LOD	2.51	73.23	5.92	12.91	6.11
68	2942	2019-01-10 11:36:00	Mining	300	ppm	Final	20080024000005_125	< LOD	14.88	51.91	33.01	< LOD	7.54	8.18	3.87	11	3.95	4.01	2.25	740009	1026.91	6.94	2.44	18.43	2.99	123.75	2.34	10.78	1.4	22.78	1	146.54	3.71	4.37	1.87	17.01	2.78	< LOD	1.5	< LOD	4.03	13.78	2.71	< LOD	1.51	69.57	5.77	< LOD	10.39
69	2941	2019-01-10 11:28:00	Mining	300	ppm	Final	20080024000005_125	< LOD	14.98	< LOD	49.83	< LOD	8.65	6.63	3.88	15.88	3.43	5.79	2.32	715814	1116.16	9.99	2.51	18.26	3.07	136.53	2.46	12.09	1.47	23.48	1	159.03	3.87	3.27	1.91	15.89	2.96	< LOD	1.5	< LOD	4.16	20.4	2.95	< LOD	2.8	72.63	5.9	< LOD	10.77
70	2940	2019-01-10 11:22:00	Mining	300	ppm	Final	20080024000005_125	< LOD	15.16	75.12	33.54	< LOD	9.8	< LOD	8.47	13.59	3.41	< LOD	4.59	729649	1074.99	8.3	2.48	18.55	3.04	137.78	2.47	12.24	1.44	20.18	1	148.49	3.77	4.12	1.89	14.63	2.84	< LOD	1.5	< LOD	4.25	17.19	2.84	< LOD	1.56	70.35	5.84	< LOD	12.87
71	2939	2019-01-10 11:15:00	Mining	300	ppm	Final	20080024000005_125	< LOD	15	< LOD	77.74	< LOD	12.15	< LOD	5.82	11	4.77	< LOD	3.38	697365	1170.71	8.47	2.47	15.4	3	131.27	2.4	10.42	1.42	20.46	1	152.71	3.78	4.29	1.9	15.7	2.91	< LOD	1.5	< LOD	4.19	19.44	2.89	< LOD	2.31	69.24	5.78	< LOD	8.72
72	2938	2019-01-10 11:09:00	Mining	300	ppm	Final	20080024000005_125	< LOD	15.22	71.21	33.68	< LOD	10.19	< LOD	7.54	11	4.95	3.63	2.28	683288	1214.66	7.64	2.46	19.53	3.01	135.22	2.43	11.52	1.44	23.08	1	155.86	3.78	< LOD	2.8	16	2.92	< LOD	1.5	< LOD	4.03	20.07	2.9	< LOD	1.53	78.07	5.97	< LOD	11.03
73	2937	2019-01-10 11:01:00	Mining	300	ppm	Final	20080024000005_125	< LOD	15.22	67.86	33.79	< LOD	8.83	< LOD	8.51	14.92	3.46	< LOD	3.12	712531	1130.26	10	2.51	17.37	3.07	145.07	2.54	11.75	1.47	22.79	1	157.93	3.87	4.13	1.93	15.98	2.94	< LOD	1.5	< LOD	4.14	19.13	2.92	< LOD	1.57	68.77	5.83	< LOD	12.99
74	2936	2019-01-10 10:54:00	Mining	300	ppm	Final	20080024000005_125	< LOD	15.57	59.76	34.33	< LOD	8.96	< LOD	7.3	11	3.21	< LOD	4.21	707370	1153.07	10.58	2.54	18.17	3.11	175.59	2.79	11.87	1.48	21.45	1	156.96	3.9	5.23	1.97	16.88	2.96	< LOD	1.5	< LOD	4.25	17.97	2.91	< LOD	2.71	76.79	6.05	< LOD	11.31
75	2935	2019-01-10 10:47:00	Mining	300	ppm	Final	20080024000005_125	< LOD	15.28	64.45	33.89	< LOD	11.13	9.71	3.98	14.98	3.47	4.77	2.34	679766	1234.69	7.41	2.48	21.77	3.06	150.37	2.57	12.19	1.47	22.22	1	160.21	3.85	5.17	1.96	17.8	2.97	< LOD	1.5	< LOD	4.21	18.77	2.91	< LOD	2.16	77.49	6.02	< LOD	10.13
76	2928	2019-01-09 19:01:00	Mining	300	ppm	Final	20080022500016_2103	< LOD	12.6	145.39	29.77	< LOD	7.65	7.92	3.44	20.14	3.12	4.89	2.07	698871	1108.09	13.17	2.4	9.35	2.91	158.36	2.58	32.36	1.41	107.78	1.74	50.02	2.9	4.38	1.51	4.38	2.23	< LOD	1.5	< LOD	3.78	10.18	2.37	< LOD	2.25	40.39	4.86	19.1	5.78
77	2927	2019-01-09 18:53:00	Mining	300	ppm	Final	20080022500016_2103	< LOD	12.89	172.96	30.21	< LOD	9.5	7.16	3.47	20.91	3.15	4.29	2.07	707484	1083.61	11.02	2.38	11.79	2.9	181.64	2.74	32.12	1.4	105.27	1.72	49.69	2.87	3.8	1.49	5.92	2.27	< LOD	1.5	< LOD	3.76	10.01	2.37	< LOD	1.5	36.04	4.76	15.82	5.73
78	2926	2019-01-09 18:45:00	Mining	300	ppm	Final	20080022500016_2103	< LOD	12.76	158.82	30.15	< LOD	9.13	7.15	3.47	21.01	3.16	6.22	2.11	700494	1098.55	11.28	2.37	10.19	2.88	180.29	2.73	32.17	1.4	105.91	1.72	49.84	2.86	5.08	1.52	4.4	2.27	< LOD	1.5	< LOD	3.57	11.78	2.41	< LOD	1.5	39.88	4.83	13.04	5.64
79	2925	2019-01-09 18:37:00	Mining	300	ppm	Final	20080022500016_2103	< LOD	13.12	210.22	30.55	< LOD	8.03	< LOD	5.17	21.55	3.18	4.26	2.07	699319	1100.78	9.97	2.36	9.67	2.85	185.83	2.76	32.79	1.41	105.4	1.71	51.41	2.85	4.29	1.5	5.44	2.25	< LOD	1.5	< LOD	3.86	10.14	2.36	< LOD	1.5	35.55	4.73	13.96	5.65
80	2924	2019-01-09 18:31:00	Mining	300	ppm	Final	20080022500016_2103	< LOD	12.82	201.95	29.99	9.91	5.11	7.14	3.43	19.7	3.1	8.47	2.13	687983	1145.28	10.6	2.36	10.9	2.87	204.86	2.89	33.34	1.42	103.97	1.7	51.2	2.86	5.55	1.53	< LOD	3.38	< LOD	1.5	< LOD	3.94	12.3	2.42	< LOD	1.5	37.53	4.77	19.18	5.75
81	2923	2019-01-09 18:23:00	Mining	300	ppm	Final	20080022500016_2103	< LOD	13.01	171.12	30.47	< LOD	6.76	< LOD	5.21	20.94	3.18	5.98	2.12	713946	1059.21	10.08	2.36	11.48	2.87	158.46	2.57	31.46	1.39	103.44	1.7	50.67	2.85	3.73	1.49	3.39	2.25	< LOD	1.5	< LOD	3.67	12.27	2.41	< LOD	2.32	37.57	4.78	18.44	5.74
82	2922	2019-01-09 18:16:00	Mining	300	ppm	Final	20080022500016_2103	< LOD	12.8	177.52	30.36	< LOD	8.36	5.34	3.46	22.32	3.19	7.56	2.16	705919	1095.37	13.46	2.41	9.27	2.92	159.12	2.6	33.2	1.42	106.25	1.73	47.76	2.9	4.12	1.5	3.41	2.24	< LOD	1.5	< LOD	3.86	11.09	2.4	< LOD	1.6	33.78	4.71	15.74	5.74
83	2921	2019-01-09 18:09:00	Mining	300	ppm	Final	20080022500016_2103	< LOD	12.49	118.89	29.59	< LOD	6.97	< LOD	5.09	22.16	3.15	7.55	2.14	680664	1167.1	14.78	2.44	10.53	2.97	171.43	2.71	35.68	1.46	110.84	1.78	50.4	2.95	4.47	1.53	4.73	2.33	< LOD	1.5	< LOD	3.82	12.8	2.47	< LOD	2.1	38.94	4.87	23.96	5.97
84	2920	2019-01-09 18:00:00	Mining	300	ppm	Final	20080022500016_2103	< LOD	12.4	194.72	29.17	< LOD	10.43	8.75	3.35	20.55	3.03	6.31	2.04	685356	1126.65	10.02	2.34	10.02	2.84	177.9	2.69	33.42	1.42	107.02	1.72	56.02	2.87	4.06	1.5	4.67	2.23	< LOD	1.5	< LOD	3.72	10.71	2.37	< LOD	1.5	36.22	4.71	14.87	5.61
85	2919	2019-01-09 17:48:00	Mining	300	ppm	Final	Standard_GBW_07411	85.65	13.05	661.94	39.86	< LOD	8.92	34.47	4.52	23.82	3.82	< LOD	3.25	579138	1722.73	< LOD	4.48	17.16	3.45	182.93	3.4	27.68	2.99	85.99	1.94	115.6	4.02	14.62	5.23	149.75	22.55	< LOD	2.27	< LOD	9.09	2654.67	28.23	5.73	2.34	3854.47	41.46	43.74	7.62
86	2918	2019-01-09 17:42:00	Mining	300	ppm	Final	Standard_GBW_07411	87.22	13.01	686.72	39.81	< LOD	10.01	34.71	4.5	27.84	3.85	< LOD	3.38	599133	1665.87	< LOD	3.54	19.44	3.47	182.1	3.43	23.35	2.99	86.56	1.96	115.05	4.04	8.74	5.24	144.7	22.88	< LOD	2.4	< LOD	9.06	2686.41	28.7	5.04	2.34	3858.85	41.87	41.93	7.66
87	2917	2019-01-09 17:34:00	Mining	300	ppm	Final	20080022500017_2106	< LOD	13.4	< LOD	46.36	< LOD	10.37	10.49	3.67	21.53	3.32	7.87	2.27	697639	1190.27	15.76	2.56	17.96	3.13	196.91	3	18.66	1.41	100.19	1.77	94.2	3.44	8.01	1.84	16.51	2.79	< LOD	1.5	< LOD	4.13	14.09	2.71	< LOD	2.5	102.69	6.49	< LOD	8.97
88	2916	2019-01-09 17:26:00	Mining	300	ppm	Final	20080022500017_2106	< LOD	13.46	< LOD	46.4	< LOD	8.08	8.73	3.65	21.75	3.32	10.46	2.32	688084	1230.96	17.66	2.55	16.21	3.12	205.2	3.03	18.94	1.4	100.12	1.75	90.76	3.41	8.27	1.83	14.41	2.82	< LOD	1.5	< LOD	4.1	18.35	2.81	3.18	1.68	98.38	6.34	11.92	5.97
89	2915	2019-01-09 17:13:00	Mining	300	ppm	Final	20080022500017_2106	< LOD	13.33	48.62	30.7	< LOD	8	6.66	3.59	18.47	3.23	6.85	2.2	705023	1160.7	12.16	2.47	17.26	3.02	181.97	2.83	16.44	1.34	92.34	1.67	89.38	3.29	6.46	1.75	15.3	2.74	< LOD	2	< LOD	3.9	15.4	2.7	< LOD	2.6	93.07	6.18	< LOD	8.65
90	2914	2019-01-09 17:05:00	Mining	300	ppm	Final	20080022500017_2106	< LOD	13.25	< LOD	49.7	< LOD	10.2	8.69	3.65	22.39	3.34	7.47	2.27	680637	1267.19	17.72	2.6	18	3.18	225.85	3.23	19.52	1.43	101.77	1.79	94.44	3.49	7.94	1.86	14.72	2.85	< LOD	2.04	< LOD	3.99	17	2.84	< LOD	2.51	102.93	6.53	12.31	6.12
91	2913	2019-01-09 16:57:00	Mining	300	ppm	Final	20080022500017_2106	< LOD	14.14	< LOD	62.75	< LOD	8.55	9.11	3.85	23.2	3.54	7.55	2.4	680970	1314.24	21.75	2.77	15.74	3.38	261.33	3.63	21.56	1.53	102.13	1.88	92.68	3.69	7.29	1.95	18.7	3.09	< LOD	1.51	< LOD	4.75	17.37	2.99	6.66	1.92	121.91	7.25	24.94	6.82
92	2912	2019-01-09 16:48:00	Mining	300	ppm	Final	20080022500017_2106	< LOD	13.44	< LOD	45.73	< LOD	9.36	9.61	3.72	22.43	3.4	6.95	2.29	680170	1287.94	20.9	2.67	14.23	3.25	213.14	3.19	20.81	1.47	102.16	1.82	92.69	3.57	7.32	1.88	16.85	2.96	< LOD	1.5	< LOD	4.34	18.39	2.9	3.15	1.74	110.11	6.78	13.02	6.25
93	2911	2019-01-09 16:39:00	Mining	300	ppm	Final	20080022500017_2106	< LOD	13.24	< LOD	75.79	< LOD	8.06	8.36	3.64	22.51	3.33	8.54	2.28	703902	1175.84	15.08	2.56	17.24	3.13	186.24	2.93	18.81	1.41	98.77	1.76	92.88	3.43	8.31	1.86	10.3	2.77	< LOD	1.5	< LOD	4.2	18.52	2.85	< LOD	2.61	104.06	6.54	13.88	6.1
94	2910	2019-01-09 16:32:00	Mining	300	ppm	Final	20080022500017_2106	< LOD	13.47	< LOD	62.25	< LOD	8.03	6.96	3.6	22.57	3.33	7.98	2.28	674316	1295.09	16.02	2.58	18.43	3.17	223.12	3.22	21.11	1.46	102.95	1.81	98.67	3.5	6.64	1.84	16.36	2.89	< LOD	1.5	< LOD	4.15	17.86	2.83	< LOD	3.04	104.91	6.59	15.44	6.23
95	2909	2019-01-09 16:26:00	Mining	300	ppm	Final	20080021200009_2253	< LOD	14.9	190.78	33.71	< LOD	9.31	< LOD	5.75	11	4.89	3.99	2.26	642448	1327.36	11.84	2.5	22.96	3.1	204.46	2.96	20.26	1.49	48.78	1.24	129.92	3.63	9.76	1.94	7.9	2.89	< LOD	1.5	< LOD	4.08	26.12	3.03	< LOD	2.5	61.57	5.6	17.52	6.08
96	2908	2019-01-09 16:16:00	Mining	300	ppm	Final	20080021200009_2253	< LOD	14.69	208.77	33.03	< LOD	11.77	6.02	3.76	17.41	3.35	5.02	2.24	655646	1284.36	10.22	2.46	24.63	3.07	208.82	2.97	22.48	1.52	47.43	1.22	134.89	3.61	9.73	1.93	10.16	2.9	< LOD	1.5	< LOD	4.25	25.83	2.99	< LOD	1.91	66.3	5.66	19.96	6.07
97	2907	2019-01-09 16:09:00	Mining	300	ppm	Final	20080021200009_2253	< LOD	15.16	256.72	33.96	< LOD	12.72	< LOD	8.21	11	4.71	< LOD	3.33	651573	1311.62	9.12	2.46	24.84	3.07	200.93	2.93	20.66	1.5	49.25	1.24	133.95	3.61	9.56	1.93	7.66	2.88	< LOD	1.67	< LOD	4.08	26.21	3.03	< LOD	1.52	59.8	5.54	17.51	6.06
98	2906	2019-01-09 16:02:00	Mining	300	ppm	Final	20080021200009_2253	< LOD	14.55	201.74	33.22	< LOD	8.89	< LOD	5.65	11	4.54	3.47	2.21	668690	1255.04	10.32	2.46	23.02	3.06	200.63	2.91	21.43	1.5	47.97	1.22	130.95	3.59	8.51	1.9	5.27	2.89	< LOD	1.5	< LOD	4.15	29.86	3.09	< LOD	2.47	64.6	5.61	< LOD	8.7
99	2905	2019-01-09 15:54:00	Mining	300	ppm	Final	20080021200009_2253	< LOD	14.45	184.84	32.92	< LOD	12.39	6.62	3.76	13.68	3.3	< LOD	3.27	660576	1284.12	9.15	2.45	24.22	3.05	201.98	2.93	21.66	1.5	48.14	1.23	131.57	3.58	9.05	1.91	9.65	2.91	< LOD	1.5	< LOD	4.09	26.43	3.01	< LOD	2.86	53.77	5.38	16.39	6
100	2904	2019-01-09 15:45:00	Mining	300	ppm	Final	20080021200009_2253	< LOD	14.25	158.56	32.59	< LOD	8.1	< LOD	6.19	18.03	3.35	4.94	2.22	682051	1208.35	9.77	2.45	25.53	3.06	197.1	2.89	21	1.5	48.08	1.23	135.55	3.61	11.22	1.96	9.32	2.87	< LOD	1.5	< LOD	4.03	25.17	2.98	< LOD	2.46	61.32	5.54	17.42	6.01
101	2903	2019-01-09 15:35:00	Mining	300	ppm	Final	20080021200009_2253	< LOD	8.58	35.53	20.19	< LOD	7.18	4.54	2.38	18.1	2.19	2.78	1.42	849250	599.23	11.2	2.25	16.06	2.75	144.9	2.27	17.78	1.24	34.2	1	88.33	3	8.02	1.59	< LOD	3.49	< LOD	1.5	< LOD	3.34	19.27	2.49	2.35	1.47	45.5	4.71	22.19	5.36
102	2902	2019-01-09 15:27:00	Mining	300	ppm	Final	20080021200009_2253	< LOD	14.48	182.99	32.71	< LOD	10.54	< LOD	8.03	11	3.63	< LOD	3.24	722063	1079.16	10.55	2.46	23.3	3.06	198.63	2.89	21.85	1.5	48.17	1.22	130.57	3.58	10.29	1.93	7.6	2.83	< LOD	1.5	< LOD	4.07	25.28	2.97	< LOD	2.23	56.32	5.42	20.56	6.04
103	2901	2019-01-09 15:08:00	Mining	300	ppm	Final	20080021200009_2253	< LOD	14.38	215.8	32.71	< LOD	8.34	< LOD	5.56	17.6	3.32	3.82	2.18	676461	1227.62	7.01	2.42	26.39	3.03	206.66	2.95	19.73	1.49	47.35	1.22	137.55	3.59	8.82	1.92	5.19	2.88	< LOD	1.5	< LOD	4.24	29.27	3.08	< LOD	1.5	66.41	5.65	12.89	5.87
104	2900	2019-01-09 14:53:00	Mining	300	ppm	Final	20080020100025_1112	< LOD	14.44	196.29	33.28	< LOD	10.62	< LOD	5.63	17.77	3.38	4.72	2.25	698720	1183.59	8.53	2.47	22.26	3.07	171.23	2.81	24.6	1.51	99.97	1.77	110.6	3.46	5.47	1.82	16.58	2.88	< LOD	1.5	< LOD	4.02	17.98	2.82	< LOD	1.95	123.37	6.88	21.17	6.19
105	2899	2019-01-09 14:45:00	Mining	300	ppm	Final	20080020100025_1112	< LOD	14.45	239.77	33.1	< LOD	8.35	7.58	3.75	18.65	3.35	4.97	2.23	659094	1307.77	9.21	2.46	22.97	3.06	164.72	2.74	23.4	1.49	98.5	1.74	112.22	3.46	5.73	1.82	17.93	2.86	< LOD	1.5	< LOD	4.13	16.54	2.77	< LOD	1.51	120.04	6.78	23.78	6.17
106	2898	2019-01-09 14:32:00	Mining	300	ppm	Final	20080020100025_1112	< LOD	14.51	221.33	33.05	9.91	5.6	7.44	3.76	17.39	3.34	4.65	2.22	671850	1278.8	9.39	2.48	22.04	3.08	163.94	2.76	23.31	1.5	99.72	1.77	109.86	3.47	5.02	1.81	14.01	2.84	< LOD	1.5	< LOD	4.16	18.36	2.84	< LOD	1.51	120.63	6.84	21.97	6.19
107	2897	2019-01-09 14:14:00	Mining	300	ppm	Final	20080020100025_1112	< LOD	14.34	203.66	33.04	< LOD	12.17	5.74	3.75	17.79	3.36	6.46	2.27	692088	1212.64	10.06	2.5	21.53	3.1	165.52	2.78	22.68	1.5	101.09	1.78	112.33	3.51	4.69	1.82	15.2	2.83	< LOD	1.5	< LOD	4.13	16.61	2.8	< LOD	1.79	123.83	6.93	24.8	6.28
108	2896	2019-01-09 14:08:00	Mining	300	ppm	Final	20080020100025_1112	< LOD	14.54	204.08	33.22	< LOD	11.34	5.91	3.77	16.7	3.36	6.08	2.28	688259	1218.72	11.54	2.51	21.58	3.11	175.17	2.84	24.98	1.52	100.71	1.77	111.1	3.5	7.01	1.87	17.21	2.87	< LOD	1.5	< LOD	4.07	16.86	2.81	< LOD	2.47	120.87	6.84	27.79	6.3
109	2895	2019-01-09 14:01:00	Mining	300	ppm	Final	20080020100025_1112	< LOD	79.47	1038.94	173.02	< LOD	65.96	36.19	19.23	40.92	16.99	29.49	11.51	58491.2	5030.03	9.33	4.56	21.85	5.64	188.16	5.29	24.16	2.76	107.98	3.28	121.25	6.41	5.04	3.32	13.08	5.32	< LOD	3.98	< LOD	8.75	18.69	5.28	< LOD	4.05	92.1	12.26	< LOD	18.79
110	2894	2019-01-09 13:54:00	Mining	300	ppm	Final	20080020100025_1112	< LOD	66.13	882.86	144.09	< LOD	50.86	30.26	16.05	38.69	14.24	21.83	9.56	217976	4168.23	9.23	4.24	22.08	5.26	181.2	4.85	25.67	2.59	102.62	2.99	116.76	5.93	6.9	3.15	9.89	4.74	< LOD	3.58	< LOD	7.78	17.32	4.81	< LOD	3.66	94.97	11.34	< LOD	17.12
111	2893	2019-01-09 13:48:00	Mining	300	ppm	Final	20080020100025_1112	< LOD	17.73	227.71	40.11	< LOD	10.18	< LOD	6.79	18.41	4.06	5.24	2.71	598100	1594.62	9.38	2.63	22.24	3.26	168.71	2.95	23.81	1.59	100.14	1.87	108.73	3.66	6.2	1.95	13.98	3.04	< LOD	1.5	< LOD	4.32	19.52	3.04	< LOD	1.75	121.66	7.28	21.18	6.69
112	2892	2019-01-09 13:41:00	Mining	300	ppm	Final	20080020100025_1112	< LOD	14.43	197.3	32.91	< LOD	8.37	9.46	3.78	17.61	3.34	6.2	2.27	691827	1196.5	10.67	2.48	21.79	3.07	171.91	2.79	23.76	1.49	99.43	1.75	111.66	3.47	6.86	1.84	17.96	2.81	< LOD	1.5	< LOD	4.1	14.78	2.72	< LOD	2.32	122.22	6.81	24.68	6.18
113	2891	2019-01-09 13:34:00	Mining	300	ppm	Final	20080020100013_769	< LOD	14.26	143.77	32.77	< LOD	11.7	11.7	3.83	21.44	3.43	7.97	2.34	696778	1183.99	14.17	2.57	20.59	3.19	207.62	3.14	30.1	1.63	124.4	2	123.53	3.68	7.7	1.93	11.64	2.93	< LOD	1.5	< LOD	4.27	22.72	3.01	< LOD	1.59	170.2	7.83	84.81	7.52
114	2890	2019-01-09 13:28:00	Mining	300	ppm	Final	20080020100013_769	< LOD	13.96	106.15	32.29	< LOD	12.41	10.53	3.77	25.34	3.47	6.2	2.29	676080	1250.98	14.44	2.58	23.22	3.21	213.76	3.19	29.37	1.63	127.92	2.03	129.71	3.73	9.79	2	12.75	2.98	< LOD	1.5	< LOD	4.34	23.52	3.04	< LOD	1.75	172.49	7.88	94.21	7.7
115	2889	2019-01-09 13:21:00	Mining	300	ppm	Final	20080020100013_769	< LOD	13.98	137.8	32.38	< LOD	8.29	5.84	3.71	25.12	3.46	7.54	2.31	698000	1188.68	14.37	2.59	19.75	3.21	214.44	3.21	28.56	1.62	126.4	2.03	124	3.71	6.8	1.93	11.94	2.96	< LOD	1.5	< LOD	4.29	22.73	3.02	< LOD	1.62	176.9	8.02	95.05	7.78
116	2888	2019-01-09 13:14:00	Mining	300	ppm	Final	20080020100013_769	< LOD	13.18	60	30.37	< LOD	12.12	8.04	3.55	22.13	3.26	7.31	2.21	777027	887.2	15.3	2.52	18.36	3.11	184.49	2.9	27.38	1.54	116.35	1.89	116.58	3.56	8.11	1.88	12.69	2.83	< LOD	1.86	< LOD	4.19	20.28	2.87	4.04	1.7	172.27	7.7	98.81	7.55
117	2887	2019-01-09 13:08:00	Mining	300	ppm	Final	20080020100013_769	< LOD	13.77	97.82	31.9	9.51	5.51	9.38	3.71	21.99	3.39	7.52	2.31	715955	1123.39	18.44	2.63	21.69	3.27	210.34	3.18	30.92	1.65	132.54	2.08	127.36	3.77	10.56	2.03	10.32	3	< LOD	1.5	< LOD	4.21	26.07	3.13	< LOD	2.54	179.43	8.01	108.82	7.98
118	2886	2019-01-09 13:01:00	Mining	300	ppm	Final	20080020100013_769	< LOD	13.75	92.92	32.2	< LOD	7.28	11.33	3.78	19.98	3.38	5.56	2.27	658131	1305.98	14.54	2.57	21.62	3.19	209.02	3.15	29.46	1.63	127.84	2.02	127.71	3.7	10.12	2	10.22	2.97	< LOD	2.24	< LOD	4.15	25.36	3.1	< LOD	1.83	173.11	7.86	97.44	7.72
119	2885	2019-01-09 12:55:00	Mining	300	ppm	Final	20080020100013_769	< LOD	13.75	104.01	31.84	< LOD	8.19	7.23	3.68	20.76	3.35	7.7	2.3	666031	1286.9	16.23	2.59	22.54	3.23	217.74	3.22	32.9	1.67	131.11	2.06	129.68	3.75	11.03	2.03	14.06	3.01	< LOD	1.5	< LOD	4.16	23.68	3.04	< LOD	2.37	172.97	7.86	95.78	7.7
120	2884	2019-01-09 12:48:00	Mining	300	ppm	Final	20080020100013_769	< LOD	34.33	313.6	76.16	< LOD	25.37	25.42	8.79	43.6	8.05	14.99	5.34	391258	2728.62	15.62	3.49	20.17	4.32	214.79	4.29	31.71	2.23	133.6	2.78	131.31	5.03	7.36	2.61	11.22	4	< LOD	2.42	< LOD	6.2	24.08	4.09	< LOD	2.71	167.62	10.6	32.8	10.14
121	2883	2019-01-09 12:42:00	Mining	300	ppm	Final	20080015500007_22811	< LOD	14.07	166.91	32.66	< LOD	9.51	< LOD	5.57	16.43	3.32	5.3	2.24	725156	1074.79	11.76	2.51	18.52	3.09	223.82	3.15	23.35	1.47	80.25	1.58	97.07	3.39	6.55	1.83	20.12	3.17	< LOD	1.5	< LOD	4.32	27.21	3.07	< LOD	2.52	76.03	5.92	17.39	6.09
122	2882	2019-01-09 12:35:00	Mining	300	ppm	Final	20080015500007_22811	< LOD	13.74	148.14	32.22	< LOD	10.63	13.39	3.77	24.45	3.43	8.54	2.33	602790	1487.61	16.97	2.62	19.29	3.23	251.52	3.43	26.92	1.58	89.04	1.7	107.24	3.61	9.45	1.98	20.7	3.31	< LOD	1.5	< LOD	4.33	30.04	3.23	< LOD	2.56	85.76	6.23	11.86	6.15
123	2881	2019-01-09 12:30:00	Mining	300	ppm	Final	20080015500007_22811	< LOD	13.74	95.08	32.54	< LOD	7.33	11.24	3.81	22.97	3.47	5.64	2.31	660347	1325.61	20.2	2.68	17.14	3.3	264.91	3.56	28.7	1.62	92.2	1.74	108.03	3.7	9.25	2.01	22.01	3.41	< LOD	2.15	< LOD	4.31	31.57	3.32	< LOD	2.56	91.64	6.41	12.08	6.27
124	2880	2019-01-09 12:23:00	Mining	300	ppm	Final	20080015500007_22811	< LOD	13.95	137.82	32.62	< LOD	8.34	11.86	3.8	23.01	3.45	8.68	2.36	649350	1359.46	18.87	2.67	19.49	3.29	251.88	3.47	28.01	1.6	91.08	1.73	105.78	3.66	8.75	1.99	22.74	3.41	< LOD	1.5	< LOD	4.32	31.33	3.3	< LOD	2.57	86.15	6.3	14.93	6.31
125	2879	2019-01-09 12:16:00	Mining	300	ppm	Final	20080015500007_22811	< LOD	13.85	161.54	32.37	< LOD	10.71	12.02	3.76	26.35	3.47	8.26	2.33	691417	1218.92	18.92	2.66	18.73	3.27	251.76	3.45	27.96	1.6	88.81	1.7	108.22	3.67	6.97	1.94	20.79	3.36	< LOD	1.96	< LOD	4.27	31.8	3.3	< LOD	1.96	87.09	6.29	16.16	6.3
126	2878	2019-01-09 12:09:00	Mining	300	ppm	Final	20080015500007_22811	< LOD	13.84	98.77	32.48	< LOD	8.39	9.69	3.78	21.45	3.44	7.65	2.35	662399	1321.36	18.32	2.67	19.01	3.3	246.71	3.44	28.64	1.62	89.55	1.72	107.52	3.68	8.9	2	19.79	3.38	< LOD	2.15	< LOD	4.2	31.42	3.34	< LOD	3.2	85.37	6.31	< LOD	12.94
127	2877	2019-01-09 12:01:00	Mining	300	ppm	Final	Standard_GBW_07411	< LOD	13.87	92.78	32.44	< LOD	8.72	8.5	3.77	21.57	3.44	8.31	2.36	653761	1344.96	17.99	2.65	18.41	3.27	248.71	3.44	28.84	1.61	91.72	1.74	107.24	3.66	9.16	1.99	22.77	3.37	< LOD	2.27	< LOD	4.37	29.38	3.26	< LOD	2.56	83.42	6.23	13.57	6.27
128	2876	2019-01-09 11:47:00	Mining	300	ppm	Final	Standard_GBW_07411	84.53	13	682.78	39.81	< LOD	13.92	35.27	4.52	27.56	3.85	< LOD	3.64	567220	1768.71	< LOD	5.49	16.76	3.45	177.96	3.36	23.91	2.97	85	1.93	115.65	4.02	< LOD	6.64	143.18	22.72	< LOD	2.38	< LOD	8.77	2713.05	28.59	5.59	2.31	3861.32	41.46	50.77	7.76
129	2875	2019-01-09 11:42:00	Mining	300	ppm	Final	Standard_GBW_07411	81.27	12.91	672.45	39.68	< LOD	8.31	33.53	4.49	26.51	3.83	< LOD	3.62	567357	1769.58	< LOD	5.22	16.45	3.41	179.78	3.35	23.33	2.93	85.96	1.93	115.36	3.99	< LOD	6.62	170.49	22.45	< LOD	2.36	< LOD	8.99	2672.23	28.14	< LOD	3.37	3818.26	40.89	42.65	7.5
130	2867	2019-01-08 16:05:00	Mining	300	ppm	Final	20080011500010_2077	< LOD	13.4	283.66	32.17	9.46	5.38	5.99	3.59	20.2	3.27	5.57	2.18	670521	1247.92	14.87	2.51	13.45	3.05	212.73	3.18	22.55	1.46	210.15	2.6	105.02	3.45	6.31	1.8	6.12	2.63	< LOD	1.5	< LOD	4.14	18.91	2.8	< LOD	1.5	64.72	5.59	12.17	5.91
131	2866	2019-01-08 15:59:00	Mining	300	ppm	Final	20080011500010_2077	< LOD	13.69	305.45	32.58	< LOD	8.11	8.74	3.67	19.8	3.29	7.81	2.25	669922	1236.08	11.52	2.46	15.23	3.01	214.12	3.19	21.51	1.45	216.64	2.63	109.63	3.43	6.6	1.8	5.31	2.55	< LOD	1.5	< LOD	3.92	16.86	2.74	< LOD	1.5	60.36	5.49	17.74	6.01
132	2865	2019-01-08 15:52:00	Mining	300	ppm	Final	20080011500010_2077	< LOD	14.03	316.47	32.94	< LOD	8.2	5.54	3.66	21.41	3.34	6.89	2.25	670178	1239.94	9.37	2.44	17.17	2.99	214.57	3.19	21.97	1.46	213.17	2.61	109.37	3.41	7.07	1.81	7.02	2.6	< LOD	1.57	< LOD	4.08	16.99	2.75	< LOD	1.5	65.42	5.61	17.32	5.98
133	2864	2019-01-08 15:46:00	Mining	300	ppm	Final	20080011500010_2077	< LOD	13.66	328.85	32.62	8.65	5.41	9.17	3.66	21.01	3.3	6	2.21	666630	1246.61	12.44	2.48	15.05	3.02	223.58	3.25	22.49	1.46	212.52	2.61	106.77	3.43	7.23	1.81	6.73	2.56	< LOD	1.5	< LOD	4.18	15.63	2.71	< LOD	1.5	60.36	5.5	15.63	5.98
134	2863	2019-01-08 15:38:00	Mining	300	ppm	Final	20080011500010_2077	< LOD	13.33	312.41	32.05	< LOD	9.89	8.42	3.6	18.27	3.21	5.96	2.17	662904	1250.62	10.21	2.44	17.68	3	228.69	3.27	22.34	1.47	208.64	2.57	112.38	3.43	7.38	1.82	5.67	2.58	< LOD	1.57	< LOD	4.02	17.45	2.76	< LOD	1.87	60.34	5.48	18.26	5.99
135	2862	2019-01-08 15:31:00	Mining	300	ppm	Final	20080011500010_2077	< LOD	13.52	284.97	32.06	8.51	5.35	9.68	3.63	20.56	3.26	7.68	2.22	659962	1270.41	11.45	2.45	16.35	3	213.54	3.18	22.12	1.44	213.2	2.6	103.41	3.38	7.08	1.79	5.7	2.53	< LOD	1.67	< LOD	4.01	15.86	2.71	< LOD	1.5	62.06	5.51	21.53	6.06
136	2861	2019-01-08 15:25:00	Mining	300	ppm	Final	20080011500010_2077	< LOD	13.69	333.16	32.52	9.43	5.39	8.04	3.63	20.01	3.27	7.85	2.24	666096	1257.5	12.21	2.47	13.92	3.01	225.15	3.26	21.17	1.44	209.39	2.59	106.16	3.43	7.48	1.82	6.89	2.6	< LOD	2.02	< LOD	4.14	16.41	2.75	< LOD	2.8	59.57	5.48	14.59	5.94
137	2860	2019-01-08 15:18:00	Mining	300	ppm	Final	20080011500010_2077	< LOD	13.62	347.37	32.48	< LOD	11.88	5.97	3.59	19.61	3.25	6.43	2.2	695364	1163.09	11.36	2.46	14.34	3	218.65	3.22	22.88	1.46	210.5	2.59	105.19	3.4	6.24	1.78	5.69	2.54	< LOD	1.51	< LOD	4.03	15.62	2.71	< LOD	2.18	60.21	5.49	12.07	5.89
138	2859	2019-01-08 15:12:00	Mining	300	ppm	Final	20080011500010_2077	< LOD	13.39	279.26	32.12	< LOD	7.68	9.35	3.64	19.48	3.26	6.85	2.21	665825	1241.72	13.93	2.48	14.5	3.02	228.01	3.26	23.68	1.47	214.65	2.61	106.18	3.43	7.95	1.82	8.45	2.63	< LOD	1.98	< LOD	4.06	16.88	2.75	< LOD	2.67	61.26	5.48	12.75	5.85
139	2857	2019-01-08 15:00:00	Mining	300	ppm	Final	20080011810021_603	< LOD	15.53	412.47	35.41	< LOD	10.88	< LOD	5.84	11	2.71	< LOD	3.21	702155	1178.66	< LOD	3.65	27.21	3.05	140.07	2.67	17.33	1.52	138.72	2.12	147.21	3.72	11.71	2.08	4.52	2.74	< LOD	1.5	< LOD	4.16	20.28	2.98	< LOD	1.58	161.86	7.72	97.37	7.68
140	2856	2019-01-08 14:54:00	Mining	300	ppm	Final	20080011810021_603	< LOD	15.15	388.93	34.74	< LOD	9.38	< LOD	5.75	13.47	3.36	< LOD	3.32	704570	1156.85	< LOD	4.97	28.18	3.03	141.25	2.65	16.93	1.51	139.1	2.11	150.71	3.7	12.29	2.08	5.13	2.75	< LOD	2.11	< LOD	3.94	20.72	2.98	< LOD	1.55	155.17	7.54	88.06	7.47
141	2855	2019-01-08 14:47:00	Mining	300	ppm	Final	20080011810021_603	< LOD	15.07	328.23	34.3	< LOD	9.72	6.77	3.82	13.58	3.35	< LOD	3.32	710931	1137.14	6.19	2.45	24.46	3.05	144.8	2.68	17.42	1.5	143.48	2.14	144.23	3.69	10.48	2.03	7.23	2.79	< LOD	1.5	< LOD	4.13	21.32	2.97	< LOD	1.76	164.17	7.68	103.75	7.73
142	2854	2019-01-08 14:40:00	Mining	300	ppm	Final	20080011810021_603	< LOD	15	341.95	34.34	< LOD	9.45	6.11	3.82	14.39	3.35	< LOD	3.32	703977	1155.06	5.64	2.43	25.86	3.04	145.94	2.67	17.79	1.5	140.13	2.1	146.56	3.69	10	2.01	5.28	2.72	< LOD	1.71	< LOD	4.16	20.58	2.95	< LOD	1.71	166.74	7.69	96.96	7.58
143	2853	2019-01-08 14:34:00	Mining	300	ppm	Final	20080011810021_603	< LOD	14.9	366.18	34.13	< LOD	7.39	7	3.79	11	4.41	3.69	2.21	703807	1159.79	6.59	2.45	23.93	3.05	140.32	2.64	19.26	1.52	141.72	2.12	146.5	3.71	14.18	2.11	< LOD	4.14	< LOD	1.5	< LOD	4.23	23	3.02	< LOD	1.5	160.58	7.59	90.29	7.45
144	2852	2019-01-08 14:27:00	Mining	300	ppm	Final	20080011810021_603	< LOD	15.21	402.4	34.84	< LOD	8.08	< LOD	7.13	11	4.48	3.74	2.24	694904	1217.96	6.66	2.5	24.94	3.12	144.39	2.73	17.23	1.53	137.83	2.14	148.1	3.81	9.84	2.06	5.58	2.8	< LOD	1.5	< LOD	4.14	21.07	3.02	< LOD	1.54	156.23	7.69	96.83	7.76
145	2851	2019-01-08 14:21:00	Mining	300	ppm	Final	20080011810021_603	< LOD	15.14	331.47	34.92	< LOD	7.63	< LOD	5.72	11	4.82	4.28	2.29	719058	1109.92	6.85	2.46	24.23	3.06	137.38	2.63	18.94	1.53	140.79	2.12	150.32	3.75	11.97	2.08	5	2.77	< LOD	1.5	< LOD	4.15	21.93	3	< LOD	1.6	163.93	7.68	86.08	7.44
146	2850	2019-01-08 14:13:00	Mining	300	ppm	Final	20080011810021_603	< LOD	15.02	370.81	34.67	< LOD	11.74	5.91	3.84	11	4.38	4.17	2.26	723045	1087.59	6.78	2.44	22.25	3.02	150.02	2.69	18.7	1.51	139.62	2.09	150.02	3.72	9.68	2.01	5	2.78	< LOD	1.5	< LOD	3.95	23.73	3.01	< LOD	1.5	152.33	7.41	83.33	7.32
147	2849	2019-01-08 14:06:00	Mining	300	ppm	Final	20080010730006_1310	< LOD	13.63	323.34	31.59	< LOD	7.11	6.25	3.52	16.59	3.13	3.14	2.06	686200	1183.31	6.62	2.37	25.38	2.97	149.63	2.57	25.83	1.59	99.56	1.71	170.98	3.77	7.48	1.92	9.39	2.66	< LOD	1.5	< LOD	3.71	18.39	2.76	< LOD	1.69	83.21	5.89	14.1	5.72
148	2848	2019-01-08 13:58:00	Mining	300	ppm	Final	20080010730006_1310	< LOD	13.65	301.1	31.85	< LOD	9.28	6.27	3.57	13.74	3.13	6.28	2.15	696704	1157.96	6.95	2.38	26.84	2.99	173.38	2.74	25.82	1.59	99	1.71	170.88	3.78	5.71	1.88	9.47	2.62	< LOD	1.5	< LOD	4.04	16.9	2.71	< LOD	2.15	75.11	5.74	19.11	5.87
149	2847	2019-01-08 13:50:00	Mining	300	ppm	Final	20080010730006_1310	< LOD	13.56	320.56	32.02	< LOD	10.21	6.62	3.57	18.43	3.2	4.63	2.12	688238	1183.23	7.18	2.38	26.42	2.99	144.78	2.54	26.04	1.59	100.8	1.72	167.59	3.76	8.11	1.93	11.46	2.69	< LOD	1.5	< LOD	3.88	17.96	2.75	< LOD	1.99	85.55	5.96	11.08	5.7
150	2846	2019-01-08 13:44:00	Mining	300	ppm	Final	20080010730006_1310	< LOD	13.87	367.48	32.07	< LOD	8.16	9.15	3.59	18.97	3.19	6.58	2.15	688052	1175.13	6.7	2.36	27.96	2.98	160.31	2.63	26.34	1.58	98.78	1.69	168.09	3.73	5.9	1.87	9.72	2.6	< LOD	1.5	< LOD	3.91	16.91	2.69	< LOD	1.5	81.62	5.84	16.91	5.79
151	2845	2019-01-08 13:37:00	Mining	300	ppm	Final	20080010730006_1310	< LOD	13.71	347.49	32.08	< LOD	6.91	< LOD	5.33	14.63	3.14	4.4	2.11	678431	1222.17	8.29	2.4	24.32	3	155.23	2.62	25.44	1.58	100.17	1.72	166.58	3.77	7.25	1.91	10.79	2.68	< LOD	1.5	< LOD	3.9	17.65	2.74	< LOD	1.62	82.66	5.91	15.51	5.79
152	2844	2019-01-08 13:31:00	Mining	300	ppm	Final	20080010730006_1310	< LOD	13.52	332.64	31.62	< LOD	7.84	< LOD	5.25	16.38	3.12	< LOD	3.07	669324	1243.99	5.79	2.37	31.7	3.01	148.12	2.56	25.46	1.59	100.19	1.72	171.45	3.77	6.5	1.9	8.67	2.63	< LOD	1.5	< LOD	3.88	17.89	2.74	< LOD	2.27	76.62	5.77	15.9	5.75
153	2843	2019-01-08 13:24:00	Mining	300	ppm	Final	20080010730006_1310	< LOD	13.74	353.66	31.88	< LOD	10.94	< LOD	7.34	15.7	3.13	5.14	2.11	675378	1217.01	5.11	2.36	26.92	2.97	154.75	2.61	26.03	1.59	101.84	1.73	170.46	3.75	9.45	1.96	9.83	2.67	< LOD	1.5	< LOD	4.02	18.34	2.76	< LOD	1.5	77.18	5.77	10.45	5.64
154	2842	2019-01-08 13:18:00	Mining	300	ppm	Final	20080010730006_1310	< LOD	13.8	355.99	32.32	< LOD	9.46	9	3.62	17.96	3.2	3.28	2.1	666715	1265.01	8.73	2.42	25.4	3.03	154.2	2.63	26.29	1.6	101.74	1.74	167.78	3.81	8.36	1.95	7.92	2.61	< LOD	1.5	< LOD	3.97	17.11	2.75	< LOD	1.5	78.36	5.84	16.06	5.82
155	2841	2019-01-08 13:11:00	Mining	300	ppm	Final	20080010730009_1138	< LOD	13.42	185.83	31.7	< LOD	7.47	6.3	3.61	17.73	3.23	7.09	2.21	669128	1258.89	9.66	2.44	20.61	3.02	200.66	3.06	22.52	1.39	177.39	2.36	76.59	3.16	5.99	1.72	6.8	2.43	< LOD	1.5	< LOD	3.96	11.26	2.56	< LOD	1.5	101.13	6.36	83.22	7.19
156	2840	2019-01-08 13:04:00	Mining	300	ppm	Final	20080010730009_1138	< LOD	13.6	220.59	31.84	< LOD	8.84	< LOD	5.37	21.92	3.29	6.19	2.19	681210	1230.96	11.44	2.48	15.79	3.03	214.05	3.17	22.53	1.41	172.87	2.34	76.06	3.2	4.77	1.71	6.33	2.54	< LOD	1.5	< LOD	4.12	15.37	2.7	< LOD	1.5	96.92	6.31	77.95	7.15
157	2839	2019-01-08 12:57:00	Mining	300	ppm	Final	20080010730009_1138	< LOD	13.46	182.53	31.51	9.34	5.35	9.79	3.62	21.09	3.27	6.63	2.21	669332	1278.48	14.21	2.53	17.32	3.11	209.96	3.19	23.74	1.44	185.51	2.45	78.58	3.29	6.18	1.78	5.78	2.56	< LOD	1.5	< LOD	4.05	15.4	2.75	< LOD	3.1	105.8	6.54	78.54	7.25
158	2838	2019-01-08 12:49:00	Mining	300	ppm	Final	20080010730009_1138	< LOD	13.42	161.71	32.06	< LOD	7.13	10.43	3.7	20.05	3.32	4.38	2.2	692807	1199.25	13.02	2.52	20.54	3.11	219.25	3.24	23.15	1.43	179.4	2.4	80.46	3.28	5.32	1.75	6.5	2.53	< LOD	1.5	< LOD	4.03	13.95	2.69	< LOD	1.5	104.9	6.52	86.91	7.39
159	2837	2019-01-08 12:42:00	Mining	300	ppm	Final	20080010730009_1138	< LOD	13.24	160.83	31.5	10.36	5.39	10.08	3.63	23.99	3.33	6.95	2.23	678578	1256.03	16.33	2.58	15.95	3.15	198.06	3.12	23.14	1.44	183.2	2.45	78.75	3.34	6.69	1.81	8.21	2.64	< LOD	1.5	< LOD	4.17	15.37	2.77	< LOD	1.53	105.87	6.59	87.17	7.47
160	2836	2019-01-08 12:36:00	Mining	300	ppm	Final	20080010730009_1138	< LOD	13.49	195.14	31.73	< LOD	8.03	7.57	3.62	18.78	3.25	6.42	2.2	694780	1176.64	11.16	2.47	17.85	3.03	199.28	3.06	21.94	1.39	172.86	2.33	77.03	3.19	5.3	1.72	7.47	2.52	< LOD	1.5	< LOD	3.96	13.69	2.65	< LOD	1.5	99.77	6.34	78.29	7.11
161	2835	2019-01-08 12:29:00	Mining	300	ppm	Final	20080010730009_1138	< LOD	13.39	186.6	31.57	< LOD	8.01	9.07	3.62	22	3.29	8.91	2.26	702493	1149.22	11.66	2.48	19.19	3.05	207.63	3.12	22.95	1.41	175.35	2.35	78.75	3.22	5.16	1.73	6.68	2.55	< LOD	1.5	< LOD	3.92	15.22	2.71	< LOD	1.5	97.2	6.3	78.25	7.15
162	2834	2019-01-08 12:23:00	Mining	300	ppm	Final	20080010730009_1138	< LOD	13.21	182.15	31.14	< LOD	10.81	6.48	3.54	20.34	3.22	7.28	2.19	706181	1139.68	12.65	2.48	17.34	3.04	198.81	3.06	23.08	1.41	180.63	2.39	77.25	3.21	4.77	1.7	8.28	2.49	< LOD	1.5	< LOD	3.93	12.22	2.6	< LOD	1.5	99.87	6.33	83.43	7.19
163	2833	2019-01-08 12:16:00	Mining	300	ppm	Final	Standard_GBW_07411	83.89	13	699.12	39.92	< LOD	13.37	35.94	4.52	28.3	3.87	< LOD	3.62	596239	1655.06	< LOD	3.69	18.86	3.44	180.7	3.38	24.09	2.96	85.78	1.94	116.09	4	< LOD	10.11	169.78	22.68	< LOD	2.36	< LOD	9.11	2676.18	28.34	< LOD	3.4	3843.76	41.34	43.65	7.6
164	2832	2019-01-08 12:09:00	Mining	300	ppm	Final	Standard_GBW_07411	53.66	9.61	391.1	29.13	< LOD	5.97	18.38	3.31	18.44	2.82	< LOD	2.71	565905	1770.85	< LOD	4.25	15.52	3.46	190.13	3.46	23.52	2.96	88.86	1.96	114.12	4.04	< LOD	7.72	146.84	22.66	< LOD	2.42	< LOD	9.06	2708.07	28.52	4.31	2.29	3871.42	41.46	50.83	7.76
165	2831	2019-01-08 12:02:00	Mining	300	ppm	Final	Standard_GBW_07411	83.42	12.92	704.46	39.7	< LOD	12.42	38.64	4.52	26.62	3.82	< LOD	3.62	641650	1486.98	< LOD	3.15	19.3	3.38	187.26	3.39	24.77	2.93	85.5	1.91	117.47	3.94	< LOD	6.56	166.14	22.38	< LOD	2.32	< LOD	8.89	2681.56	27.98	< LOD	3.35	3870.23	40.93	42.54	7.48
166	2830	2019-01-08 11:56:00	Mining	300	ppm	Final	Standard_GBW_07411	83.16	13.03	642.33	39.74	< LOD	10.34	35.17	4.53	25.31	3.84	3.75	2.44	620662	1562.32	< LOD	4.7	15.85	3.4	184.09	3.39	23.61	2.95	86.62	1.93	116.29	3.99	< LOD	6.68	182.77	22.63	< LOD	2.35	< LOD	9.19	2692.81	28.26	< LOD	3.4	3876.6	41.27	47.22	7.63
167	2829	2019-01-08 11:49:00	Mining	300	ppm	Final	Standard_GBW_07411	90.99	12.9	694.79	39.38	< LOD	13.42	36.46	4.47	27.77	3.81	< LOD	3.6	587885	1677.16	< LOD	5.25	13.26	3.4	181.95	3.37	26.35	2.96	85.54	1.92	114.9	3.99	< LOD	6.67	165.52	22.54	< LOD	2.34	< LOD	9.01	2685.04	28.21	4.67	2.29	3856.18	41.15	40.96	7.49
168	499	2014-11-14 14:46:00	Mining	270	ppm	Final	20080022500016_2103	38.97	9.01	699.45	34.35	< LOD	13.6	< LOD	4.87	11	3.72	< LOD	2.41	608432	1486.14	< LOD	3	9	1.63	150.03	2.68	27.18	1.53	166.17	2.85	63.25	2.94	2.35	1.52	< LOD	3.6	< LOD	1.5	< LOD	4.52	8.5	2.72	< LOD	1.82	43.06	5.21	< LOD	11.81
169	498	2014-11-14 14:37:00	Mining	270	ppm	Final	20080022500016_2103	34.47	9.67	546.67	36.24	< LOD	12.03	< LOD	5.32	11	4.1	< LOD	2.77	668518	1310.98	< LOD	4.12	7.87	1.69	154.98	2.74	28.51	1.55	151.27	2.75	56.69	3	3.98	1.57	3.92	2.38	< LOD	1.5	< LOD	4.49	5.93	2.66	< LOD	1.97	42.58	5.32	< LOD	12.73
170	497	2014-11-14 14:32:00	Mining	270	ppm	Final	20080022500016_2103	38.47	9.18	619.01	34.63	< LOD	11.28	< LOD	5.05	11	3.88	< LOD	2.52	644247	1371.26	< LOD	5.46	7.27	1.65	131.95	2.54	29.67	1.53	166.94	2.86	50.11	2.89	3.23	1.51	< LOD	3.64	< LOD	1.5	< LOD	4.44	10.34	2.77	< LOD	1.83	27.64	4.8	< LOD	12
171	493	2014-11-14 14:10:00	Mining	270	ppm	Final	20080011500010_2077	60.46	9.69	942.19	37.28	< LOD	11.55	< LOD	5.11	11	3.89	< LOD	2.53	701815	1231.67	< LOD	3.18	11.17	1.7	183.61	3.12	15.1	1.53	294.47	4	109.76	3.48	3.96	1.78	4.34	2.75	< LOD	1.5	< LOD	4.7	15.69	3.14	< LOD	2	61.76	5.86	< LOD	12.17
172	492	2014-11-14 14:05:00	Mining	270	ppm	Final	20080011500010_2077	64.41	9.96	990.14	38.4	< LOD	11.92	< LOD	5.29	11	4.02	< LOD	2.67	702600	1239.42	< LOD	5.22	8.99	1.72	186.74	3.17	16.26	1.56	292.74	4.02	109.3	3.53	6.29	1.85	6.96	2.76	< LOD	1.5	< LOD	4.74	12.53	3.07	< LOD	1.99	53.92	5.71	< LOD	16.89
173	491	2014-11-14 14:00:00	Mining	270	ppm	Final	20080011500010_2077	54.32	9.3	942.71	35.98	< LOD	11.11	< LOD	4.87	11	3.66	< LOD	2.38	664711	1354.97	< LOD	3.73	9.79	1.69	188.11	3.09	18.51	1.54	235.53	3.51	99.97	3.38	6.14	1.8	< LOD	4	< LOD	1.5	< LOD	4.6	14.21	3.08	< LOD	1.87	58.95	5.72	< LOD	14.48
174	487	2014-11-14 13:37:00	Mining	270	ppm	Final	Standard_GBW_07411	72.93	10.56	665.63	38.4	< LOD	18.43	31	4.69	27.91	5.17	< LOD	4.76	691792	1298.03	< LOD	5.22	10.84	1.95	184.83	3.43	26.13	3.15	128.58	2.96	113.41	4.02	< LOD	10.37	160.56	23.14	< LOD	2.44	< LOD	9.55	2862.38	30.81	< LOD	3.91	3831.67	41.99	50.06	10.52
175	480	2014-11-14 12:49:00	Mining	270	ppm	Final	20080022500017_2106	79.61	10.76	720.54	39.43	< LOD	12.8	< LOD	5.68	11	4.33	< LOD	2.88	659673	1434.64	< LOD	3.2	11.57	1.71	160.87	2.85	12.06	1.46	131.78	2.65	91.46	3.33	4.7	1.78	7.55	2.91	< LOD	1.53	< LOD	4.88	17.43	3.22	< LOD	2.16	81.63	6.47	< LOD	13.19
176	479	2014-11-14 12:43:00	Mining	270	ppm	Final	20080022500017_2106	50.72	10.99	551.25	40.51	< LOD	13.53	< LOD	6.06	11	4.52	< LOD	3.11	724055	1204.13	< LOD	4.76	11.72	1.78	181.85	3.07	14.38	1.51	125.76	2.64	85.32	3.39	7	1.86	9.93	2.97	< LOD	1.6	< LOD	4.85	15.34	3.21	< LOD	2.29	84.33	6.67	< LOD	13.42
177	478	2014-11-14 12:36:00	Mining	270	ppm	Final	20080022500017_2106	19.89	11.75	493.05	44.27	< LOD	14.93	< LOD	7.19	11	5.22	< LOD	3.62	648638	1623.71	5.82	3.21	11.1	1.98	169.07	3.29	17.5	1.75	166.23	3.32	104.05	3.96	8.39	2.15	18.08	3.49	< LOD	2.24	< LOD	5.93	15.11	3.59	< LOD	4.92	109.89	8	< LOD	18.92
178	474	2014-11-14 12:13:00	Mining	270	ppm	Final	Standard_GBW_07411	66.68	10.74	673.16	39.33	< LOD	16.68	30.58	4.8	32.75	5.36	< LOD	5.24	695723	1271.29	< LOD	5.98	9.38	1.92	189.7	3.43	24.56	3.11	126.26	2.9	112.77	3.98	< LOD	10.25	175.81	22.99	< LOD	2.52	< LOD	9.58	2873.56	30.56	< LOD	4.69	3852.01	41.68	46.19	10.31
179	470	2014-11-14 11:49:00	Mining	270	ppm	Final	20080029600009_2008	76.07	10.89	982.26	41.33	< LOD	12.82	< LOD	5.76	11	4.39	< LOD	2.93	586552	1681.61	< LOD	5.86	14.33	1.85	164.63	3.01	21.75	1.8	139.8	2.84	149.37	4.04	8.67	2.16	9.21	3.29	< LOD	1.62	< LOD	5.21	24.89	3.69	< LOD	2.3	71.54	6.43	< LOD	13.7
180	469	2014-11-14 11:44:00	Mining	270	ppm	Final	20080029600009_2008	44.97	10.95	934.22	42.52	< LOD	14.71	< LOD	6.78	11	4.64	< LOD	3.15	578030	1711.09	< LOD	4.46	15.65	1.88	181.4	3.2	23.75	1.87	185.68	3.3	162.73	4.18	9.49	2.24	11.96	3.48	< LOD	1.77	< LOD	5.21	29.23	3.86	< LOD	2.41	81.71	6.71	< LOD	14.04
181	468	2014-11-14 11:39:00	Mining	270	ppm	Final	20080029600009_2008	83.48	11.04	1025.89	41.81	< LOD	12.88	< LOD	5.72	11	4.42	< LOD	2.94	553494	1822.63	< LOD	3.95	15.24	1.85	179.29	3.15	21.75	1.82	138.91	2.86	151.98	4.06	7.28	2.15	9.66	3.38	< LOD	1.65	< LOD	5.23	26.77	3.78	< LOD	2.35	73.91	6.54	< LOD	14.21
182	458	2014-11-14 10:43:00	Mining	270	ppm	Final	Standard_GBW_07411	63.39	10.58	656.24	38.75	< LOD	12.6	32.04	4.75	30.66	5.26	< LOD	3.93	692759	1293.06	< LOD	5.41	12.5	1.97	184.29	3.43	23.18	3.15	130.43	2.98	116.59	4.05	< LOD	11.17	183.65	23.39	< LOD	2.49	< LOD	9.46	2906.24	31.13	< LOD	4.28	3870.9	42.26	58.19	10.68
183	427	2014-11-13 15:11:00	Mining	270	ppm	Final	20080029600055_2221	75.37	9.99	741	36.88	< LOD	11.87	< LOD	5.27	11	4.01	< LOD	2.6	638751	1441.12	5.68	2.85	9.18	1.76	248.43	3.45	29.15	1.69	81.12	2.09	95.77	3.46	10.74	1.92	6.68	2.76	< LOD	1.5	< LOD	4.75	12.58	3.07	< LOD	1.96	66.43	6.01	< LOD	12.34
184	426	2014-11-13 15:01:00	Mining	270	ppm	Final	20080029600055_2221	88.34	9.66	879.23	35.9	< LOD	11.26	< LOD	4.93	11	3.76	< LOD	2.4	585029	1617.47	< LOD	3.18	12.24	1.72	223	3.26	20.83	1.59	77.1	2.05	97.11	3.37	4.99	1.76	6.6	2.63	< LOD	1.5	< LOD	4.78	8.49	2.9	< LOD	1.95	46	5.5	< LOD	12.07
185	425	2014-11-13 14:56:00	Mining	270	ppm	Final	20080029600055_2221	20.55	9.85	546.15	37.37	< LOD	12.37	< LOD	5.57	11	4.22	< LOD	2.89	626998	1455.98	6.34	2.89	13	1.81	304.74	3.88	30.43	1.77	95.95	2.27	116.82	3.66	8.45	1.95	9.99	2.95	< LOD	1.61	< LOD	4.82	15.9	3.23	< LOD	2.27	58.44	5.87	< LOD	13.05
186	418	2014-11-13 14:17:00	Mining	270	ppm	Final	Standard_GBW_07411	62.17	10.68	684	39.33	< LOD	16.48	32.79	4.81	24.72	5.24	< LOD	4.01	693921	1285.12	< LOD	3.96	11.56	1.94	185.21	3.42	24.91	3.11	128.54	2.94	114.42	3.99	< LOD	10.78	158.9	22.9	< LOD	2.43	< LOD	9.45	2825.23	30.42	< LOD	2.92	3777.82	41.44	51.59	10.54
187	404	2014-11-13 12:54:00	Mining	270	ppm	Final	20080010730009_1138	53	9.99	761.07	37.7	< LOD	12.06	< LOD	5.35	11	4.06	< LOD	2.72	628608	1519.28	< LOD	3.67	12.76	1.76	191.88	3.21	17.76	1.55	234.4	3.61	88.57	3.37	5.13	1.82	7.83	2.8	< LOD	1.51	< LOD	4.8	11.77	3.11	< LOD	2.09	121.94	7.37	69.75	10.22
188	403	2014-11-13 12:49:00	Mining	270	ppm	Final	20080010730009_1138	38.49	10.33	699.41	39.26	< LOD	12.74	< LOD	5.72	11	4.34	< LOD	2.96	667465	1381.99	< LOD	4.34	12.08	1.8	201.32	3.33	20.39	1.61	256.88	3.83	88.72	3.45	4.53	1.83	7.42	2.78	< LOD	1.63	< LOD	5.11	10.52	3.1	< LOD	2.24	120.68	7.46	97.39	11.12
189	402	2014-11-13 12:44:00	Mining	270	ppm	Final	20080010730009_1138	41.23	9.37	688.52	35.46	< LOD	11.36	< LOD	5.07	11	3.84	< LOD	2.49	592471	1643.7	< LOD	5.79	11.15	1.76	210.84	3.36	20.7	1.6	255.19	3.78	91.87	3.42	4.86	1.84	4.65	2.82	< LOD	1.5	< LOD	4.79	16.08	3.24	< LOD	2.01	135.12	7.6	130.69	11.21
190	395	2014-11-13 12:06:00	Mining	270	ppm	Final	20080010730006_1310	28.76	11.69	717.94	45	< LOD	21.63	< LOD	7.98	11	5.15	< LOD	3.57	584411	1765.17	6.83	3.06	17.58	1.96	143.21	2.93	29.07	1.99	179.52	3.29	177.42	4.4	8.13	2.21	11.24	3.26	< LOD	1.96	< LOD	5.72	19.05	3.55	4.17	2.44	106.92	7.53	< LOD	15.7
191	394	2014-11-13 12:01:00	Mining	270	ppm	Final	20080010730006_1310	< LOD	16.91	657.21	43.75	< LOD	14.35	< LOD	7.45	11	5.07	< LOD	3.44	594279	1745.5	< LOD	4.09	19.41	1.95	141.22	2.95	27.43	2	178.05	3.32	181.86	4.42	6.25	2.19	11.66	3.27	< LOD	2.05	< LOD	5.65	17.72	3.55	< LOD	4.32	104.83	7.58	< LOD	19.48
192	393	2014-11-13 11:56:00	Mining	270	ppm	Final	20080010730006_1310	44.62	17.48	826.26	66.95	< LOD	22.41	< LOD	10.41	< LOD	11.57	< LOD	5.78	803408	1206.4	< LOD	6.71	14.71	2.47	124.83	3.5	21.95	2.33	131.47	3.62	136.92	5.19	6.41	2.6	6.16	3.82	< LOD	3.61	< LOD	8.49	10.71	4.18	7.74	3.73	76.61	9.49	< LOD	34.76
193	392	2014-11-13 11:50:00	Mining	270	ppm	Final	Standard_GBW_07411	68.73	10.42	653.69	37.96	< LOD	13.45	33.13	4.67	28.98	5.13	< LOD	3.85	692044	1302.84	< LOD	4.79	11.39	1.98	184.31	3.43	25.88	3.17	129.41	2.97	112.6	4.05	< LOD	9.16	174.47	23.36	< LOD	2.46	< LOD	9.6	2898.64	31.14	< LOD	3.66	3839.87	42.14	40.81	10.31
194	308	2014-11-11 14:35:00	Mining	270	ppm	Final	20080020100013_769	42.68	9.37	677.37	35.34	< LOD	11.27	< LOD	5.02	11	3.85	< LOD	2.48	548045	1772.09	6.23	2.88	13.64	1.81	216.29	3.34	26.92	1.77	175.86	3.09	128.69	3.78	5	1.93	16.42	3.29	< LOD	1.68	< LOD	4.6	23.88	3.49	< LOD	1.98	161.38	8.05	107.02	10.68
195	307	2014-11-11 14:25:00	Mining	270	ppm	Final	20080020100013_769	50.33	9.22	652.04	34.43	< LOD	11.08	< LOD	4.88	11	3.73	< LOD	2.46	551320	1762.03	< LOD	5.9	15.31	1.8	211.94	3.32	26	1.76	173.55	3.08	127.21	3.74	6.37	1.97	15.08	3.31	< LOD	1.5	< LOD	5.03	25.66	3.54	< LOD	2.01	163.52	8.14	105.77	10.7
196	306	2014-11-11 14:19:00	Mining	270	ppm	Final	20080020100013_769	67.77	9.92	701.88	36.62	< LOD	11.71	< LOD	5.19	11	3.97	< LOD	2.64	566968	1708.83	< LOD	4.28	14.05	1.79	200.55	3.21	23.71	1.7	162.34	2.97	116.51	3.64	5.07	1.89	16.99	3.27	< LOD	1.5	< LOD	4.93	22.38	3.42	< LOD	2.11	157.34	8.02	107.27	10.81
197	305	2014-11-11 14:13:00	Mining	270	ppm	Final	Standard_GBW_07411	73.16	10.64	674.43	38.72	< LOD	12.6	30.88	4.72	31.09	5.25	< LOD	5.37	692479	1296.12	< LOD	4.85	10.31	1.95	185.1	3.44	25.08	3.17	129.25	2.97	118.73	4.07	< LOD	6.53	179.47	23.45	< LOD	2.43	< LOD	9.56	2915.49	31.24	< LOD	3.09	3890.62	42.46	61.25	10.77
198	280	2014-11-10 16:41:00	Mining	270	ppm	Final	20080020100025_1112	94.82	10.94	862.04	40.24	< LOD	12.78	< LOD	5.72	11	4.3	< LOD	2.83	670211	1424.59	< LOD	3.38	13.42	1.81	141.55	2.8	21.07	1.68	134.85	2.77	108.42	3.62	5.83	1.94	11.32	3.14	< LOD	1.55	< LOD	5.12	18.57	3.41	< LOD	2.17	149.59	8.12	< LOD	14.1
199	279	2014-11-10 16:36:00	Mining	270	ppm	Final	20080020100025_1112	60.17	9.76	651.55	36.08	< LOD	11.68	< LOD	5.19	11	3.89	< LOD	2.58	631114	1505.85	< LOD	3.42	14.32	1.74	155.15	2.77	17.2	1.56	109.71	2.4	109.68	3.49	6.3	1.86	16.3	3.09	< LOD	1.5	< LOD	4.62	17.12	3.22	< LOD	2	104.93	6.84	< LOD	14.34
200	278	2014-11-10 16:31:00	Mining	270	ppm	Final	20080020100025_1112	49.39	10.59	520.01	38.85	< LOD	12.94	< LOD	5.86	11	4.38	< LOD	2.95	674880	1345.99	< LOD	3.35	13.94	1.77	143.88	2.74	21.36	1.67	131.1	2.66	121.34	3.64	6.51	1.92	12.91	3.04	< LOD	1.5	< LOD	4.68	17.01	3.24	< LOD	2.12	119.65	7.31	< LOD	13.88
201	271	2014-11-10 15:52:00	Mining	270	ppm	Final	Standard_GBW_07411	59.92	10.42	660.09	38.3	< LOD	12.43	25.58	4.63	31.56	5.21	< LOD	5.24	695499	1276.93	< LOD	4.99	11.27	1.94	185	3.41	22.11	3.1	128.03	2.94	113.19	3.99	< LOD	8.48	163.62	23.07	< LOD	2.47	< LOD	9.33	2864.37	30.7	< LOD	4.44	3813.28	41.69	52.33	10.53
202	255	2014-11-06 14:25:00	Mining	270	ppm	Final	20080118100021_603	62.53	13.01	660.66	47.94	< LOD	18.9	< LOD	7.3	11	5.48	< LOD	3.94	667627	1527.03	< LOD	5.95	17.81	2.04	159.83	3.34	16.77	1.96	252.75	4.21	175.77	4.62	7.99	2.39	8.34	3.54	< LOD	2.29	< LOD	6.08	23.15	3.98	< LOD	2.96	235.94	10.69	111.88	13.41
203	254	2014-11-06 14:19:00	Mining	270	ppm	Final	20080118100021_603	66.08	10.04	618.32	36.67	< LOD	12	< LOD	5.36	11	4.06	< LOD	2.58	629099	1538.95	< LOD	3.65	18.15	1.85	190.64	3.3	19.81	1.81	258	3.89	166.61	4.13	12.15	2.27	8.47	3.25	< LOD	1.6	< LOD	5.1	24.32	3.68	< LOD	2.23	212.98	9.23	67.82	10.43
204	253	2014-11-06 14:14:00	Mining	270	ppm	Final	20080118100021_603	77.52	10.91	717.76	39.97	< LOD	14.49	< LOD	5.83	11	4.44	< LOD	3	657141	1437.07	< LOD	4.35	13.19	1.81	164.71	3.02	16.79	1.68	197.03	3.34	137.81	3.89	11.16	2.13	< LOD	4.45	< LOD	1.59	< LOD	5.09	18.72	3.43	< LOD	2.29	145.15	7.97	45.57	10.14
205	243	2014-11-06 13:20:00	Mining	270	ppm	Final	Standard_GBW_07411	66.5	10.7	678.36	39.2	< LOD	14.46	31.42	4.79	31.4	5.32	4.09	2.66	659707	1407.31	< LOD	6.64	9.83	1.93	186.34	3.4	28.71	3.13	126.64	2.9	114.58	4	8.97	4.91	172.41	22.82	< LOD	2.33	< LOD	9.13	2839.76	30.3	< LOD	3.88	3808.73	41.35	52.15	10.44
206	195	2014-11-05 15:16:00	Mining	270	ppm	Final	20080031400002_2325	70.65	13.57	679.9	49.83	< LOD	19.24	< LOD	7.67	11	5.72	< LOD	4.09	702350	1425.9	< LOD	3.88	13.96	2.01	187.79	3.47	27.82	1.86	115.56	2.83	73.06	3.64	5.28	1.98	16.28	3.41	< LOD	2.36	< LOD	5.97	11.19	3.47	< LOD	3.08	51.26	6.78	< LOD	16.9
207	194	2014-11-05 15:10:00	Mining	270	ppm	Final	20080031400002_2325	31.26	15.63	602.5	59.07	< LOD	29.85	< LOD	9.51	11	6.81	< LOD	5.19	850517	900.63	7.74	3.84	13.29	2.41	211.83	4.19	31.05	2.29	94.03	2.94	102.51	4.68	5.52	2.38	12.4	4.27	< LOD	3.28	< LOD	7.61	25.25	4.51	< LOD	4.1	57.45	8.33	< LOD	23.5
208	193	2014-11-05 15:04:00	Mining	270	ppm	Final	20080031400002_2325	62.83	12.18	755.55	45.46	< LOD	17.9	< LOD	6.75	11	5.06	< LOD	3.54	674126	1427.17	5.05	3.12	16.25	1.98	239.08	3.72	31.83	1.91	114.72	2.68	103.35	3.84	11.79	2.19	19.36	3.61	< LOD	2.03	< LOD	5.71	21.86	3.72	< LOD	2.66	57.49	6.47	< LOD	15.52
209	186	2014-11-05 14:25:00	Mining	270	ppm	Final	20080024000005_125	65.48	9.74	390.79	34.53	< LOD	11.64	< LOD	5.15	11	3.92	< LOD	2.59	657363	1430.39	< LOD	5.29	13.77	1.8	149.24	2.74	11.46	1.58	24.13	1.34	126.61	3.79	12.39	2.18	17.6	3.3	< LOD	1.5	< LOD	4.96	18.68	3.48	< LOD	2.11	67.39	6.18	< LOD	12.25
210	185	2014-11-05 14:20:00	Mining	270	ppm	Final	20080024000005_125	47.46	9.79	343.72	35.14	< LOD	11.93	< LOD	5.36	11	4.06	< LOD	2.65	655126	1408.58	< LOD	5.85	10.71	1.74	121.06	2.46	8.32	1.67	43.95	1.63	196.91	4.28	< LOD	3.03	17.93	3.25	< LOD	1.5	< LOD	4.6	20.64	3.4	< LOD	2.06	54.56	5.74	< LOD	12.14
211	184	2014-11-05 14:14:00	Mining	270	ppm	Final	20080024000005_125	43.81	9.54	343.12	34.29	< LOD	11.51	< LOD	5.13	11	3.93	< LOD	2.55	656450	1435.64	< LOD	5.37	14.38	1.82	156.35	2.82	12.84	1.62	25.2	1.36	130.9	3.85	11.39	2.18	18.75	3.31	< LOD	1.53	< LOD	4.82	17.45	3.47	< LOD	2.07	80.09	6.51	< LOD	12.41
212	183	2014-11-05 14:08:00	Mining	270	ppm	Final	Standard_GBW_07411	66.99	10.73	646.4	39.14	< LOD	15.72	32.06	4.81	25.65	5.26	< LOD	2.97	662485	1417.24	< LOD	4.78	10.48	1.97	180.13	3.4	24.4	3.14	127.56	2.95	112.19	4.04	< LOD	9.09	165.1	23.19	< LOD	2.43	< LOD	9.31	2857.99	30.87	< LOD	5.37	3812.58	41.98	43.61	10.42
213	156	2014-11-05 11:38:00	Mining	270	ppm	Final	20080027800005_0	40.53	11.21	586.26	41.76	< LOD	13.76	< LOD	6.26	11	4.74	< LOD	3.14	635860	1539.51	6.14	3.04	15.07	1.92	161.6	3.06	28.03	1.86	163.79	3.13	122.85	3.93	8.4	2.14	20.52	3.58	< LOD	1.84	< LOD	5.45	23.71	3.72	< LOD	2.53	77.5	6.74	< LOD	18.02
214	155	2014-11-05 11:33:00	Mining	270	ppm	Final	20080027800005_0	68.09	11.34	812.53	42.36	< LOD	13.55	< LOD	6.16	11	4.62	< LOD	3.14	658238	1427.69	< LOD	4.41	14.19	1.85	163.14	2.94	24.47	1.72	96.45	2.36	102.07	3.62	8.98	2.04	14.15	3.26	< LOD	1.78	< LOD	5.32	19.57	3.5	< LOD	2.29	62.53	6.21	< LOD	17.76
215	154	2014-11-05 11:27:00	Mining	270	ppm	Final	20080027800005_0	72.1	9.67	767.13	35.84	< LOD	11.38	< LOD	5.05	11	3.83	< LOD	2.44	623702	1520.59	< LOD	3.19	14.48	1.74	156.5	2.86	21.7	1.67	163.12	2.97	118.22	3.57	6.64	1.94	12.24	3.08	< LOD	1.5	< LOD	4.88	18.71	3.34	< LOD	2	71.27	6.14	< LOD	12.07
216	144	2014-11-05 10:32:00	Mining	270	ppm	Final	Standard_GBW_07411	71.74	10.3	665.52	37.52	< LOD	13.46	32.16	4.6	29.36	5.07	< LOD	3.8	664461	1391.73	< LOD	4.41	11.73	1.94	184.93	3.41	23.83	3.12	130.03	2.95	114.47	3.99	< LOD	7.83	176.26	23.14	< LOD	2.55	< LOD	9.3	2889.4	30.79	< LOD	3.78	3856.25	41.86	48.31	10.4
217	117	2014-11-04 13:58:00	Mining	270	ppm	Final	20080015500007_2281	50.96	10.76	801.98	40.88	< LOD	13.16	< LOD	5.88	11	4.47	< LOD	2.97	641856	1471.92	< LOD	4.22	14.26	1.82	212.47	3.28	21.26	1.72	60.05	1.9	123.17	3.75	5.27	1.96	11.94	3.43	< LOD	1.7	< LOD	5.15	30.11	3.74	< LOD	2.25	65.74	6.26	< LOD	13.73
218	116	2014-11-04 13:53:00	Mining	270	ppm	Final	20080015500007_2281	74.64	10.53	877.66	39.52	< LOD	12.48	< LOD	5.58	11	4.15	< LOD	2.71	628266	1504.78	< LOD	3.33	13.72	1.79	232.15	3.44	17.23	1.61	104.41	2.42	104.11	3.54	5.48	1.9	17.76	3.38	< LOD	1.62	< LOD	5.02	23.54	3.52	< LOD	2.15	69.02	6.25	< LOD	12.9
219	115	2014-11-04 13:48:00	Mining	270	ppm	Final	20080015500007_2281	68.77	11.01	933.54	41.82	< LOD	13.18	< LOD	5.91	11	4.51	< LOD	2.96	631744	1511.26	< LOD	6.15	13.83	1.84	265.11	3.73	19.79	1.65	114.89	2.56	99.83	3.58	8.46	2	13.61	3.36	< LOD	1.56	< LOD	5.14	24.97	3.59	< LOD	2.3	68.25	6.33	< LOD	13.33
220	111	2014-11-04 13:20:00	Mining	270	ppm	Final	Standard_GBW_07411	71.97	10.51	665.13	38.24	< LOD	15.66	30.28	4.67	29.59	5.17	4.39	2.61	661959	1391.85	< LOD	4.06	11.12	1.92	183.15	3.38	22.15	3.09	130.92	2.95	116.46	3.99	< LOD	8.89	178.43	23.01	< LOD	2.49	< LOD	9.41	2868.54	30.56	< LOD	4.82	3847.2	41.69	43.47	10.27
221	102	2014-11-04 12:34:00	Mining	270	ppm	Final	20080021200009_2253	< LOD	15.9	435.35	39.85	< LOD	13.5	< LOD	6.15	11	4.69	< LOD	3.23	673498	1362.84	6.1	2.95	16.45	1.87	227.96	3.4	19.59	1.73	74.2	2.07	139.17	3.94	12.29	2.15	< LOD	5.14	< LOD	1.78	< LOD	5.18	38.39	3.93	< LOD	2.31	60.74	6.14	< LOD	14.28
222	101	2014-11-04 12:28:00	Mining	270	ppm	Final	20080021200009_2253	29.04	8.67	511.11	32.47	< LOD	10.61	< LOD	4.69	11	3.6	< LOD	2.27	586878	1606.98	< LOD	4.2	16.43	1.78	205.16	3.11	22.33	1.7	72.22	1.97	135.73	3.73	11.56	2.05	8.14	3.38	< LOD	1.5	< LOD	4.59	38.06	3.77	< LOD	1.96	61.38	5.79	< LOD	11.95
223	100	2014-11-04 12:23:00	Mining	270	ppm	Final	20080021200009_2253	< LOD	17.37	418.15	43.54	< LOD	15.34	< LOD	6.86	11	5.17	< LOD	5.22	693696	1355.13	5.72	3.11	16.41	1.97	232.56	3.61	18.81	1.82	75.54	2.2	143.79	4.18	12.4	2.26	5.9	3.54	< LOD	1.95	< LOD	5.73	33.08	3.97	< LOD	2.77	68.08	6.76	< LOD	21.18
Device and Mode: ThermoFischerScientific 2009. Thermo Scientific Niton XL3t 900 GoldDD Analyzers. Elemental Limits of Detection for a SiO2 Matrix in Mining Mode (60 sec/filter). www.thermo.com/niton
[truncated: 31 more columns]
